# Supplementary material for: Moving from two- to multi-way interactions among binary risk factors on the additive scale
Source: PubMed Central journal article supplement (PMC8098792; doi:10.1080/24709360.2020.1850171), 2020-12-03
Supplement: TBEP_A_1850171_SM9180.pdf [file TBEP_A_1850171_SM9180.pdf]

# APPENDIX

## Section A – Interaction between 3 risk factors

We have that

$$RERI_2(X_1, X_2 | X_3 = 0) = RR_{X_1+X_2+X_3-} - RR_{X_1+X_2-X_3-} - RR_{X_1-X_2+X_3-} + RR_{X_1-X_2-X_3-} \quad (A.SA.1)$$

$$RERI_2(X_1, X_3 | X_2 = 0) = RR_{X_1+X_2-X_3+} - RR_{X_1+X_2-X_3-} - RR_{X_1-X_2-X_3+} + RR_{X_1-X_2-X_3-} \quad (A.SA.2)$$

$$RERI_2(X_2, X_3 | X_1 = 0) = RR_{X_1-X_2+X_3+} - RR_{X_1-X_2+X_3-} - RR_{X_1-X_2-X_3+} + RR_{X_1-X_2-X_3-} \quad (A.SA.3)$$

So, by replacing in equation 2 (in the paper) to  $TotRERI_3(X_1, X_2, X_3)$ ,  $RERI_2(X_1, X_2 | X_3 = 0)$ ,  $RERI_2(X_1, X_3 | X_2 = 0)$  and  $RERI_2(X_2, X_3 | X_1 = 0)$  from equations (1) (in the paper), (A.SA.1), (A.SA.2), (A.SA.3) respectively, then  $RERI_3(X_1, X_2, X_3)$  can be also written as a function of RRs as follows:

$$\begin{aligned} RERI_3(X_1, X_2, X_3) = & RR_{X_1+X_2+X_3+} \\ & - RR_{X_1+X_2+X_3-} - RR_{X_1+X_2-X_3+} - RR_{X_1-X_2+X_3+} \\ & + RR_{X_1+X_2-X_3-} + RR_{X_1-X_2+X_3-} + RR_{X_1-X_2-X_3+} \\ & - RR_{X_1-X_2-X_3-} \end{aligned}$$

as presented in expression 3 (in the paper)

Moreover, we have that

$$RERI_2(X_1, X_2 | X_3 = 1) = \frac{(RR_{X_1+X_2+X_3+} - RR_{X_1+X_2-X_3+} - RR_{X_1-X_2+X_3+} + RR_{X_1-X_2-X_3+})}{RR_{X_1-X_2-X_3+}} \quad (A.SA.4)$$

$$\text{RERI}_2(X_1, X_3 | X_2 = 1) = \frac{(\text{RR}_{X_1+X_2+X_3+} - \text{RR}_{X_1+X_2+X_3-} - \text{RR}_{X_1-X_2+X_3+} + \text{RR}_{X_1-X_2+X_3-})}{\text{RR}_{X_1-X_2+X_3-}} \quad (\text{A.SA.5})$$

$$\text{RERI}_2(X_2, X_3 | X_1 = 1) = \frac{(\text{RR}_{X_1+X_2+X_3+} - \text{RR}_{X_1+X_2+X_3-} - \text{RR}_{X_1+X_2-X_3+} + \text{RR}_{X_1+X_2-X_3-})}{\text{RR}_{X_1+X_2-X_3-}} \quad (\text{A.SA.6})$$

Of note, we standardize  $\text{RERI}_2$  when the 3<sup>rd</sup> variable is present by the RR of the 3<sup>rd</sup> variable, because in the analysis we conduct, all RR's are calculated taking into consideration that  $\text{RR}_{X_1-X_2-X_3-}$  is the reference relative risk. However, in (A.SA.4), we are interested in

- $\text{RR}_{X_1+X_2+}$ , given that  $X_3$  is present, compared to  $\text{RR}_{X_1-X_2-}$ , given that  $X_3$  is present, so the relative risk of interest will be  $\frac{\text{RR}_{X_1+X_2+}}{\text{RR}_{X_1-X_2-}}$
- $\text{RR}_{X_1+X_2-}$ , given that  $X_3$  is present, compared to  $\text{RR}_{X_1-X_2-}$ , given that  $X_3$  is present, so the relative risk of interest will be  $\frac{\text{RR}_{X_1+X_2-}}{\text{RR}_{X_1-X_2-}}$
- $\text{RR}_{X_1-X_2+}$ , given that  $X_3$  is present, compared to  $\text{RR}_{X_1-X_2-}$ , given that  $X_3$  is present, so the relative risk of interest will be  $\frac{\text{RR}_{X_1-X_2+}}{\text{RR}_{X_1-X_2-}}$
- $\text{RR}_{X_1-X_2-}$ , given that  $X_3$  is present, compared to  $\text{RR}_{X_1-X_2-}$ , given that  $X_3$  is present, so the relative risk of interest will be  $\frac{\text{RR}_{X_1-X_2-}}{\text{RR}_{X_1-X_2-}}$

By combining these bullets, it is straightforward why we standardize by  $\text{RR}_{X_1-X_2-X_3+}$  in (A.SA.4). For the same reasons we standardized by  $\text{RR}_{X_1-X_2+X_3-}$  and  $\text{RR}_{X_1+X_2-X_3-}$  in (A.SA.5) and (A.SA.6).

Moreover, it is also straightforward that if we combine (A.SA.1) and (A.SA.4), or (A.SA.2) and (A.SA.5), or (A.SA.3) and (A.SA.6), we end up to equation (4) in the manuscript.

**Section B – Estimation of interactions between 3 risk factors when using Cox (or logistic) regression and implementation in STATA**

**Estimations using Cox regression**

We consider dichotomous variables  $X_1$ ,  $X_2$  and  $X_3$  as risk factors for the outcome of interest (disease D in incidence analysis or death in mortality analysis) with  $X_i=(0,1)$  referring to the absence/presence of risk factor  $X_i$  hypothesized to be associated with the lowest/highest risk for disease D). Let also  $U_j$ ,  $j=1,2,\dots,n$  denote additional variables which serve as potential confounders to the association of  $X_i$  with D. Finally, let the hazard rate for disease D at time  $t$  be  $\lambda(t) = \lambda(t, X_1, X_2, X_3, Z_j)$  as estimated from Cox regression model including  $X_1$ ,  $X_2$  and  $X_3$ . and additional covariates  $X_1X_2, X_1X_3, X_2X_3$  and  $X_1X_2X_3$  for all 2 and 3 way interactions of  $X_1$ ,  $X_2$  and  $X_3$ , and controlling for  $n$  covariates  $U_j$ ,  $j=1,2,\dots,n$  :

$$\lambda(t) = \lambda_0(t) * \exp(a_1X_1 + a_2X_2 + a_3X_3 + a_4X_1X_2 + a_5X_1X_3 + a_6X_2X_3 + a_7X_1X_2X_3 + \sum_{j=1}^n c_jU_j), \quad (\text{A.SB.1})$$

where  $a_k$ ,  $k=1,\dots,7$  and  $c_j$ ,  $j=1,\dots,N$  are the log of the hazard ratios estimated from the Cox model.

Based on model (A.SB.1),  $\text{TotRERI}_3(X_1, X_2, X_3)$  and  $\text{RERI}_3(X_1, X_2, X_3)$  can be estimated as shown below:

$$\begin{aligned} \text{TotRERI}_3(X_1, X_2, X_3) &= \text{RR}_{X_1+X_2+X_3+} - \text{RR}_{X_1+X_2-X_3-} - \text{RR}_{X_1-X_2+X_3-} - \text{RR}_{X_1-X_2-X_3+} + 2 \\ &= \exp(a_1 + a_2 + a_3 + a_4 + a_5 + a_6 + a_7) - \exp(a_1) - \exp(a_2) - \exp(a_3) + 2 \end{aligned} \quad (\text{A.SB.2})$$

and

$$\begin{aligned} \text{RERI}_3(X_1, X_2, X_3) &= \text{RR}_{X_1+X_2+X_3+} - \text{RR}_{X_1+X_2+X_3-} - \text{RR}_{X_1+X_2-X_3+} - \text{RR}_{X_1-X_2+X_3+} \\ &\quad + \text{RR}_{X_1+X_2-X_3-} + \text{RR}_{X_1-X_2+X_3-} + \text{RR}_{X_1-X_2-X_3+} - \text{RR}_{X_1-X_2-X_3-} \end{aligned}$$

$$\begin{aligned}
&= \exp(a_1 + a_2 + a_3 + a_4 + a_5 + a_6 + a_7) - \exp(a_1 + a_2 + a_4) - \exp(a_1 + a_3 + a_5) \\
&\quad - \exp(a_2 + a_3 + a_6) + \exp(a_1) + \exp(a_2) + \exp(a_3) - 1 \qquad \text{(A.SB.3)}
\end{aligned}$$

Similarly, one can estimate also the components of  $\text{TotRERI}_3(X_1, X_2, X_3)$  and  $\text{RERI}_3(X_1, X_2, X_3)$ ,

based on (A.SB.1):

$$\text{RERI}_2(X_1, X_2 | X_3 = 0) = \exp(a_1 + a_2 + a_4) - \exp(a_1) - \exp(a_2) + 1 \qquad \text{(A.SB.4)}$$

$$\text{RERI}_2(X_1, X_3 | X_2 = 0) = \exp(a_1 + a_3 + a_5) - \exp(a_1) - \exp(a_3) + 1 \qquad \text{(A.SB.5)}$$

$$\text{RERI}_2(X_2, X_3 | X_1 = 0) = \exp(a_2 + a_3 + a_6) - \exp(a_2) - \exp(a_3) + 1 \qquad \text{(A.SB.6)}$$

$$\text{RERI}_2(X_1, X_2 | X_3 = 1) = \frac{\exp(a_1 + a_2 + a_3 + a_4 + a_5 + a_6 + a_7) - \exp(a_1 + a_3 + a_5) - \exp(a_2 + a_3 + a_6) + \exp(a_3)}{\exp(a_3)} \qquad \text{(A.SB.7)}$$

$$\text{RERI}_2(X_1, X_3 | X_2 = 1) = \frac{\exp(a_1 + a_2 + a_3 + a_4 + a_5 + a_6 + a_7) - \exp(a_1 + a_2 + a_4) - \exp(a_2 + a_3 + a_6) + \exp(a_2)}{\exp(a_2)} \qquad \text{(A.SB.8)}$$

$$\text{RERI}_2(X_2, X_3 | X_1 = 1) = \frac{\exp(a_1 + a_2 + a_3 + a_4 + a_5 + a_6 + a_7) - \exp(a_1 + a_2 + a_4) - \exp(a_1 + a_3 + a_5) + \exp(a_1)}{\exp(a_1)} \qquad \text{(A.SB.9)}$$

### **Implementation in STATA**

/\*

DESCRIPTION

time; survival time

death (outcome); 0-->alive, 1-->dead

x1 (non adherence to Mediterranean diet - 1st risk factor);

0--> high adherence to Mediterranean diet, 1--> low adherence to Mediterranean diet

x2 (being obese - 2nd risk factor);

0--> not being obese (BMI<30), 1--> being obese (BMI>=30)

x3 (smoking status - 3rd risk factor);

0--> never/former smoker, 1--> current smoker

u1 (age - 1st confounder); continuous in years

u2 (education level - 2nd confounder); categorical in 4 levels

\*/

\* IMPLEMENTATION

\* At first we compute the product terms

gen x1x2=x1\*x2

gen x1x3=x1\*x3

gen x2x3=x2\*x3

gen x1x2x3=x1\*x2\*x3

\*We run the Cox model

stset time, failure(death)

stcox x1 x2 x3 x1x2 x1x3 x2x3 x1x2x3 u1 i.u2

\*We compute TotRERI3

nlcom TotRERI3: exp(\_b[x1]+\_b[x2]+\_b[x3]+\_b[x1x2]+\_b[x1x3]+\_b[x2x3]+\_b[x1x2x3])-  
exp(\_b[x1])-exp(\_b[x2])-exp(\_b[x3])+2

\*We compute RERI3

nlcom RERI3: exp(\_b[x1]+\_b[x2]+\_b[x3]+\_b[x1x2]+\_b[x1x3]+\_b[x2x3]+\_b[x1x2x3])-  
exp(\_b[x1]+\_b[x2]+\_b[x1x2])-exp(\_b[x1]+\_b[x3]+\_b[x1x3])-  
exp(\_b[x2]+\_b[x3]+\_b[x2x3])+exp(\_b[x1])+exp(\_b[x2])+exp(\_b[x3])-1

\*We compute 2-way interactions, given the 3rd risk factor is absent

\*RERI(x1,x2/x3=0)

nlcom RERI2\_x1\_x2\_given\_x3is0: exp(\_b[x1]+\_b[x2]+\_b[x1x2])-exp(\_b[x1])-exp(\_b[x2])+1

\*RERI(x1,x3/x2=0)

nlcom RERI2\_x1\_x3\_given\_x2is0: exp(\_b[x1]+\_b[x3]+\_b[x1x3])-exp(\_b[x1])-exp(\_b[x3])+1

\*RERI(x2,x3/x1=0)

nlcom RERI2\_x2\_x3\_given\_x1is0: exp(\_b[x2]+\_b[x3]+\_b[x2x3])-exp(\_b[x2])-exp(\_b[x3])+1

\*We compute 2-way interactions, given the 3rd risk factor is present

\*RERI(x1,x2/x3=1)

nlcom RERI2\_x1\_x2\_given\_x3is1:

(exp(\_b[x1]+\_b[x2]+\_b[x3]+\_b[x1x2]+\_b[x1x3]+\_b[x2x3]+\_b[x1x2x3])-  
exp(\_b[x1]+\_b[x3]+\_b[x1x3]))-exp(\_b[x2]+\_b[x3]+\_b[x2x3])+exp(\_b[x3]))/exp(\_b[x3])

\*RERI(x1,x3/x2=1)

nlcom RERI2\_x1\_x3\_given\_x2is1:

(exp(\_b[x1]+\_b[x2]+\_b[x3]+\_b[x1x2]+\_b[x1x3]+\_b[x2x3]+\_b[x1x2x3])-  
exp(\_b[x1]+\_b[x2]+\_b[x1x2]))-exp(\_b[x2]+\_b[x3]+\_b[x2x3])+exp(\_b[x2]))/exp(\_b[x2])

\*RERI(x2,x3/x1=1)

nlcom RERI2\_x2\_x3\_given\_x1is1:

(exp(\_b[x1]+\_b[x2]+\_b[x3]+\_b[x1x2]+\_b[x1x3]+\_b[x2x3]+\_b[x1x2x3])-  
exp(\_b[x1]+\_b[x2]+\_b[x1x2]))-exp(\_b[x1]+\_b[x3]+\_b[x1x3])+exp(\_b[x1]))/exp(\_b[x1])

\*The same formulae for all these RERIs are used when running logistic regression

\* CHECK FOR QUALITATIVE INTERACTION

\*We run again the Cox model

stset time, failure(death)

stcox x1 x2 x3 x1x2 x1x3 x2x3 x1x2x3 u1 i.u2

\* To check whether the risk for x1 is increasing across strata of x2,x3, we have to examine whether the following quantities are positive (i.e. >0)

\* 1a) to see if  $RR_{100} > RR_{000}$ , we check whether  $RR_{100} - RR_{000} > 0$

disp exp(\_b[x1])-1

\* 1b) to see if  $RR_{110} > RR_{010}$ , we check whether  $RR_{110} - RR_{010} > 0$

disp exp(\_b[x1]+\_b[x2]+\_b[x1x2])-exp(\_b[x2])

\* 1c) to see if  $RR_{101} > RR_{001}$ , we check whether  $RR_{101} - RR_{001} > 0$

disp exp(\_b[x1]+\_b[x3]+\_b[x1x3])-exp(\_b[x3])

\* 1d) to see if  $RR_{111} > RR_{011}$ , we check whether  $RR_{111} - RR_{011} > 0$

disp exp(\_b[x1]+\_b[x2]+\_b[x3]+\_b[x1x2]+\_b[x1x3]+\_b[x2x3]+\_b[x1x2x3])-  
exp(\_b[x2]+\_b[x3]+\_b[x2x3])

\* To check whether the risk for x2 is increasing across strata of x1,x3

\* 2a) to see if  $RR_{010} > RR_{000}$ , we check whether  $RR_{010} - RR_{000} > 0$

disp exp(\_b[x2])-1

\* 2b) to see if  $RR_{110} > RR_{100}$ , we check whether  $RR_{110} - RR_{100} > 0$

disp exp(\_b[x1]+\_b[x2]+\_b[x1x2])-exp(\_b[x1])

\* 2c) to see if  $RR_{011} > RR_{001}$ , we check whether  $RR_{011} - RR_{001} > 0$

disp exp(\_b[x2]+\_b[x3]+\_b[x2x3])-exp(\_b[x3])

\* 2d) to see if  $RR_{111} > RR_{101}$ , we check whether  $RR_{111} - RR_{101} > 0$

disp exp(\_b[x1]+\_b[x2]+\_b[x3]+\_b[x1x2]+\_b[x1x3]+\_b[x2x3]+\_b[x1x2x3])-  
exp(\_b[x1]+\_b[x3]+\_b[x1x3])

\* To check whether the risk for x3 is increasing across strata of x1,x2

\* 2a) to see if  $RR_{001} > RR_{000}$ , we check whether  $RR_{001} - RR_{000} > 0$

disp exp(\_b[x3])-1

\* 2b) to see if  $RR_{101} > RR_{100}$ , we check whether  $RR_{101} - RR_{100} > 0$

disp exp(\_b[x1]+\_b[x3]+\_b[x1x3])-exp(\_b[x1])

\* 2c) to see if  $RR_{011} > RR_{010}$ , we check whether  $RR_{011} - RR_{010} > 0$

disp exp(\_b[x2]+\_b[x3]+\_b[x2x3])-exp(\_b[x2])

\* 2d) to see if  $RR_{111} > RR_{110}$ , we check whether  $RR_{111} - RR_{110} > 0$

disp exp(\_b[x1]+\_b[x2]+\_b[x3]+\_b[x1x2]+\_b[x1x3]+\_b[x2x3]+\_b[x1x2x3])-  
exp(\_b[x1]+\_b[x2]+\_b[x1x2])



## Section C – proofs of equations of multi way interaction

### Proof of expression (6)

We define the excess relative risk by  $ERR_{X_1\#X_2\#\dots X_n\#}$ , where  $\# = +/-$ , as

$$ERR_{X_1\#X_2\#\dots X_n\#} = RR_{X_1\#X_2\#\dots X_n\#} - RR_{X_1-X_2-\dots X_n-}, \text{ i.e.}$$

$$ERR_{X_1\#X_2\#\dots X_n\#} = RR_{X_1\#X_2\#\dots X_n\#} - 1$$

Now, expression (5) from the text can be written as

$$\begin{aligned} \text{TotRERI}_n(X_1, X_2, \dots, X_n) = & ERR_{X_1+X_2+\dots X_n+} \\ & - ERR_{X_1+X_2-\dots X_n-} - ERR_{X_1-X_2+\dots X_n-} - \dots - ERR_{X_1-X_2-\dots X_n+} \end{aligned} \quad (\text{A.SC.1})$$

$\text{TotRERI}_n$  can be expressed in terms of relative risks (see equation 5 in the paper), but also as a function of all interactions, more specifically all

$\text{RERI}_k$  for  $k \leq n$ , that is

$$\begin{aligned} \text{TotRERI}_n(X_1, X_2, \dots, X_n) = & \text{RERI}_n(X_1, X_2, \dots, X_n) \\ & + \sum_{\binom{n}{n-1}} \text{RERI}_{n-1}(X_1, X_2, \dots, X_n | 1 \text{ of the } X_i = 0) \\ & + \sum_{\binom{n}{n-2}} \text{RERI}_{n-2}(X_1, X_2, \dots, X_n | 2 \text{ of the } X_i = 0) \end{aligned}$$

$$\begin{aligned}
& \dots \\
& + \sum_{\binom{n}{2}} RERI_2(X_1, X_2, \dots, X_n | (n-2) \text{ of the } X_i = 0) \quad (\text{A. SC. 2})
\end{aligned}$$

Now, to calculate  $RERI_n$ , we can combine equations (A.SC.1) and (A.SC.2), we have to solve the recurrence relation

$$RERI_n + \sum_{\binom{n}{n-1}} RERI_{n-1} + \sum_{\binom{n}{n-2}} RERI_{n-2} + \dots + \sum_{\binom{n}{2}} RERI_2 = ERR_{X_1+X_2+\dots+X_n+} - ERR_{X_1+X_2+\dots+X_n-} - ERR_{X_1-X_2+\dots+X_n-} - \dots - ERR_{X_1-X_2+\dots+X_n+}$$

Where  $RERI_{n-k} = RERI_k(X_1, X_2, \dots, X_n | (n-k) \text{ of the } X_i = 0)$

In other words, we have to solve

$$RERI_n = ERR_{X_1+X_2+\dots+X_n+} - ERR_{X_1+X_2+\dots+X_n-} - ERR_{X_1-X_2+\dots+X_n-} - \dots - ERR_{X_1-X_2+\dots+X_n+} - \sum_{\binom{n}{1}} RERI_{n-1} - \sum_{\binom{n}{2}} RERI_{n-2} - \dots - \sum_{\binom{n}{n-2}} RERI_2$$

using as notation  $RR_{(k)} = RR_{k \text{ of the } n \text{ } X'_i=1, \text{ the rest } (n-k) \text{ } X'_i=0}$  we have that

$$RERI_n = RR_{(n)} - RR_{(0)} - \sum_{\binom{n}{1}} ERR_{(1)} - \sum_{\binom{n}{n-1}} RERI_{n-1} - \sum_{\binom{n}{n-2}} RERI_{n-2} - \dots - \sum_{\binom{n}{2}} RERI_2$$

in other words

$$RERI_n = RR_{(n)} - \sum_{\binom{n}{n-1}} RERI_{n-1} - \sum_{\binom{n}{n-2}} RERI_{n-2} - \dots - \sum_{\binom{n}{2}} RERI_2 - \sum_{\binom{n}{1}} ERR_{(1)} - \sum_{\binom{n}{0}} RR_{(0)} \quad (\text{A. SC. 3})$$

when we express all the (different)  $RERI_{n-1}$ 's from the recurrence relation (A.SC.3), we have that

$$\begin{aligned}
RERI_n = & RR_{\binom{n}{n}} - \sum_{\binom{n}{n-1}} RR_{\binom{n-1}{n-1}} + \sum_{\binom{n}{n-1}} \sum_{\binom{n-1}{n-2}} RERI_{\binom{n-2}{n-2}} + \sum_{\binom{n}{n-1}} \sum_{\binom{n-1}{n-3}} RERI_{\binom{n-3}{n-3}} + \dots + \sum_{\binom{n}{n-1}} \sum_{\binom{n-1}{n-k}} RERI_{\binom{n-k}{n-k}} + \dots + \sum_{\binom{n}{n-1}} \sum_{\binom{n-1}{1}} ERR_1 + \sum_{\binom{n}{n-1}} \sum_{\binom{n-1}{0}} RR_0 \\
& - \sum_{\binom{n}{n-2}} RERI_{\binom{n-2}{n-2}} - \sum_{\binom{n}{n-3}} RERI_{\binom{n-3}{n-3}} - \dots - \sum_{\binom{n}{k}} RERI_{\binom{n-k}{n-k}} - \dots - \sum_{\binom{n}{1}} ERR_1 - \sum_{\binom{n}{0}} RR_0 \quad (\text{A. SC. 4})
\end{aligned}$$

and when we express all  $RERI_{\binom{n-2}{n-2}}$ 's from (A.SC.4) using the recurrence relation (A.SC.3), we have that

$$\begin{aligned}
RERI_n = & RR_{\binom{n}{n}} - \sum_{\binom{n}{n-1}} RR_{\binom{n-1}{n-1}} + \left( \sum_{\binom{n}{n-1}} \sum_{\binom{n-1}{n-2}} RR_{\binom{n-2}{n-2}} - \sum_{\binom{n}{n-2}} RR_{\binom{n-2}{n-2}} \right) \\
& - \sum_{\binom{n}{n-1}} \sum_{\binom{n-1}{n-2}} \sum_{\binom{n-2}{n-3}} RERI_{\binom{n-3}{n-3}} - \sum_{\binom{n}{n-1}} \sum_{\binom{n-1}{n-2}} \sum_{\binom{n-2}{n-4}} RERI_{\binom{n-4}{n-4}} - \dots - \sum_{\binom{n}{n-1}} \sum_{\binom{n-1}{n-2}} \sum_{\binom{n-2}{n-k}} RERI_{\binom{n-k}{n-k}} - \dots - \sum_{\binom{n}{n-1}} \sum_{\binom{n-1}{n-2}} \sum_{\binom{n-2}{0}} RR_0 \\
& + \sum_{\binom{n}{n-1}} \sum_{\binom{n-1}{n-3}} RERI_{\binom{n-3}{n-3}} + \sum_{\binom{n}{n-1}} \sum_{\binom{n-1}{n-4}} RERI_{\binom{n-4}{n-4}} + \dots + \sum_{\binom{n}{n-1}} \sum_{\binom{n-1}{n-k}} RERI_{\binom{n-k}{n-k}} + \dots + \sum_{\binom{n}{n-1}} \sum_{\binom{n-1}{0}} RR_0 \\
& + \sum_{\binom{n}{n-2}} \sum_{\binom{n-2}{n-3}} RERI_{\binom{n-3}{n-3}} + \sum_{\binom{n}{n-2}} \sum_{\binom{n-2}{n-4}} RERI_{\binom{n-4}{n-4}} + \dots + \sum_{\binom{n}{n-2}} \sum_{\binom{n-2}{n-k}} RERI_{\binom{n-k}{n-k}} + \dots + \sum_{\binom{n}{n-2}} \sum_{\binom{n-2}{0}} RR_0 \\
& - \sum_{\binom{n}{n-3}} RERI_{\binom{n-3}{n-3}} - \sum_{\binom{n}{n-4}} RERI_{\binom{n-4}{n-4}} - \dots - \sum_{\binom{n}{k}} RERI_{\binom{n-k}{n-k}} - \dots - \sum_{\binom{n}{0}} RR_0 \quad (\text{A. SC. 5})
\end{aligned}$$

of interest from (A.SC.5) to compute the quantity

$$\sum_{\binom{n}{n-1}} \sum_{\binom{n-1}{n-2}} RR_{(n-2)} - \sum_{\binom{n}{n-2}} RR_{(n-2)} \quad (\text{A. SC. 6})$$

i.e. how many time we are going to sum up  $RR_{(n-2)}$

from combinatorics, it is known that

$$\binom{n}{r} \binom{r}{k} = \binom{n}{k} \binom{n-k}{r-k}$$

so from (A.SC.6) we have that

$$\binom{n}{n-1} \binom{n-1}{n-2} = \binom{n}{n-2} \binom{n-n+2}{n-1-n+2} = \binom{n}{n-2} \binom{2}{1} = 2 \binom{n}{n-2}$$

in other words,  $\binom{n}{n-1} \binom{n-1}{n-2} - \binom{n}{n-2} = 2 \binom{n}{n-2} - \binom{n}{n-2} = \binom{n}{n-2}$

so it seems that

$$\sum_{\binom{n}{n-1}} \sum_{\binom{n-1}{n-2}} RR_{(n-2)} - \sum_{\binom{n}{n-2}} RR_{(n-2)} = \sum_{\binom{n}{n-2}} RR_{(n-2)} \quad (\text{A. SC. 7})$$

However, to prove (A.SC.7) and more specifically that the summation of  $RR_{(n-2)}$  will be the sum of all different  $RR_{(n-2)}$ 's, we work as follows;

It is obvious that the part of the summation of  $RR_{(n-2)}$ , which is created through the route

$RERI_n \rightarrow RERI_{n-2}$  is equal to

$$\sum_{\binom{n}{n-2}} RR_{(n-2)}$$

more specifically it is equal the sum of all different  $RR_{(n-2)}$ 's

Now, we have to prove that the part of the summation of  $RR_{(n-2)}$ , which is created through the route

$RERI_n \rightarrow RERI_{n-1} \rightarrow RERI_{n-2}$ , which is

$$\sum_{\binom{n}{n-1}} \sum_{\binom{n-1}{n-2}} RR_{(n-2)}$$

can be written

$$\sum_{\binom{n}{n-1}} \sum_{\binom{n-1}{n-2}} RR_{(n-2)} = 2 * \sum_{\binom{n}{n-2}} RR_{(n-2)}$$

In other words, that is equal to the sum of the  $\binom{n}{n-2}$  different  $RERI_{n-2}$ , multiplied by 2

To show that, we work as follows;

We have  $\binom{n}{n-1} = n$  different  $RERI_{n-1}$ 's that lead to  $\binom{n}{n-1} \binom{n-1}{n-2} = 2 * \binom{n}{n-2} = 2 * \frac{(n-1)(n-2)}{2} RERI_{n-2}$ 's

i.e.  $(n-1)(n-2) RERI_{n-2}$ 's through the following pattern

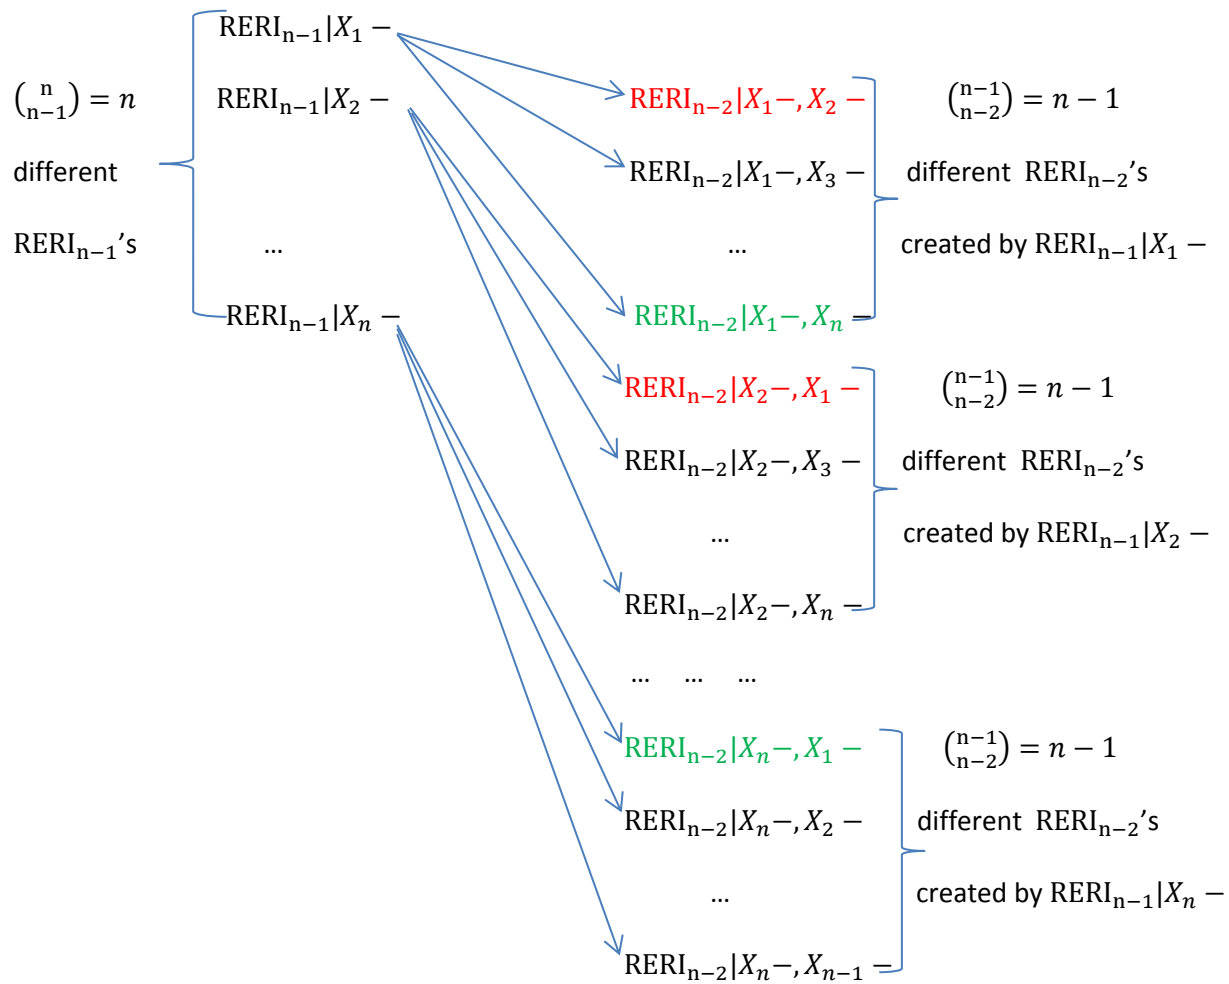

From above, we can observe that the  $\binom{n}{n-2}$  different  $RERI_{n-2}$  are created from the  $\binom{n}{n-1} = n$  different  $RERI_{n-1}$ 's twice. This is done because  $RERI_{n-2}|X_m-, X_l-$  is derived by both  $RERI_{n-1}|X_m-$  and  $RERI_{n-1}|X_l-$ , but from no other  $RERI_{n-1}|X_j-, j \neq m, j \neq l$  (for example see  $RERI_{n-2}|X_1-, X_2-$  and  $RERI_{n-2}|X_1-, X_n-$ ). So the total  $RR_{(n-2)}$  that will be created through the route  $RERI_n \rightarrow RERI_{n-1} \rightarrow RERI_{n-2}$  is equal

to

$$\sum_{\binom{n}{n-1}} \sum_{\binom{n-1}{n-2}} RR_{(n-2)} = 2 * \sum_{\binom{n}{n-2}} RR_{(n-2)}$$

After this result, (A.SC.7) is proved, because

$$\sum_{\binom{n}{n-1}} \sum_{\binom{n-1}{n-2}} RR_{(n-2)} - \sum_{\binom{n}{n-2}} RR_{(n-2)} = 2 * \sum_{\binom{n}{n-2}} RR_{(n-2)} - \sum_{\binom{n}{n-2}} RR_{(n-2)} = \sum_{\binom{n}{n-2}} RR_{(n-2)}$$

Furthermore, when we express  $RERI_{n-3}$  from (A.SC.5) using the recurrence relation (A.SC.3), we have that

$$\begin{aligned} RERI_n = & RR_{(n)} - \sum_{\binom{n}{n-1}} RR_{(n-1)} + \sum_{\binom{n}{n-2}} RR_{(n-2)} - \left( \sum_{\binom{n}{n-1}} \sum_{\binom{n-1}{n-2}} \sum_{\binom{n-2}{n-3}} RR_{(n-3)} - \sum_{\binom{n}{n-1}} \sum_{\binom{n-1}{n-3}} RR_{(n-3)} - \sum_{\binom{n}{n-2}} \sum_{\binom{n-2}{n-3}} RR_{(n-3)} + \sum_{\binom{n}{n-3}} RR_{(n-3)} \right) \\ & + \sum_{\binom{n}{n-1}} \sum_{\binom{n-1}{n-2}} \sum_{\binom{n-2}{n-3}} \sum_{\binom{n-3}{n-4}} RERI_{n-4} + \sum_{\binom{n}{n-1}} \sum_{\binom{n-1}{n-2}} \sum_{\binom{n-2}{n-3}} \sum_{\binom{n-3}{n-5}} RERI_{n-5} + \dots + \sum_{\binom{n}{n-1}} \sum_{\binom{n-1}{n-2}} \sum_{\binom{n-2}{n-3}} \sum_{\binom{n-3}{n-k}} RERI_{n-k} + \dots + \sum_{\binom{n}{n-1}} \sum_{\binom{n-1}{n-2}} \sum_{\binom{n-2}{n-3}} \sum_{\binom{n-3}{0}} RR_0 \\ & \dots \qquad \qquad \qquad \dots \qquad \qquad \qquad \dots \qquad \qquad \qquad \dots \qquad \qquad \qquad \dots \end{aligned}$$

$$\begin{array}{cccccc}
\dots & & \dots \\
\dots & & \dots \\
- \sum_{\binom{n}{n-4}} \text{RERI}_{n-4} & - & \sum_{\binom{n}{n-5}} \text{RERI}_{n-5} & - & \dots & - & \sum_{\binom{n}{k}} \text{RERI}_{n-k} & - & \sum_{\binom{n}{0}} \text{RR}_0 & & \text{(A. SC. 8)}
\end{array}$$

of interest from (A.SC.8) to compute how many time we are going to sum up  $\text{RR}_{(n-3)}$ , i.e.

$$\sum_{\binom{n}{n-1}} \sum_{\binom{n-1}{n-2}} \sum_{\binom{n-2}{n-3}} \text{RR}_{(n-3)} - \sum_{\binom{n}{n-1}} \sum_{\binom{n-1}{n-3}} \text{RR}_{(n-3)} - \sum_{\binom{n}{n-2}} \sum_{\binom{n-2}{n-3}} \text{RR}_{(n-3)} + \sum_{\binom{n}{n-3}} \text{RR}_{(n-3)} \quad \text{(A. SC. 9)}$$

We have that

$$\binom{n}{n-1} \binom{n-1}{n-2} \binom{n-2}{n-3} = 6 \binom{n}{n-3}, \quad \binom{n}{n-1} \binom{n-1}{n-3} = 3 \binom{n}{n-3}, \quad \binom{n}{n-2} \binom{n-2}{n-3} = 3 \binom{n}{n-3}, \text{ so}$$

$$6 \binom{n}{n-3} - 3 \binom{n}{n-3} - 3 \binom{n}{n-3} + \binom{n}{n-3} = \binom{n}{n-3}$$

so if we work as we did to show (A.SC.7), we will find that



$$\left( \sum_{\binom{n}{n-1}} \sum_{\binom{n-1}{n-2}} \sum_{\binom{n-2}{n-3}} RR_{(n-3)} - \sum_{\binom{n}{n-1}} \sum_{\binom{n-1}{n-3}} RR_{(n-3)} - \sum_{\binom{n}{n-2}} \sum_{\binom{n-2}{n-3}} RR_{(n-3)} + \sum_{\binom{n}{n-3}} RR_{(n-3)} \right) = \sum_{\binom{n}{n-3}} RR_{(n-3)}$$

In other words, (A.SC.9) is equal to the sum of the  $\binom{n}{n-3}$  different  $RR_{(n-3)}$ , that come from the application of (A.SC.3) for the conversion of  $\binom{n}{n-3}$  different  $RERI_{(n-3)}$ 's.

Moreover, for the parenthesis related to the summation of  $RR_{(n-3)}$  (i.e. (A.SC.9) we may also calculate it as follows:

We let

$\sum_{\binom{n}{n-1}} \sum_{\binom{n-1}{n-2}} \sum_{\binom{n-2}{n-3}} RR_{(n-3)} \rightarrow (1\ 2)_{RR_{(n-3)}}$ , i.e. the part of the summation that  $RR_{(n-3)}$  is calculated from  $RERI_{n-3}$  through the route

$RERI_n \rightarrow RERI_{n-1} \rightarrow RERI_{n-2} \rightarrow RERI_{n-3}$  (we name points [1] and [2]),

i.e. we go from  $RERI_n$  to  $RERI_{n-3}$  through  $RERI_{n-1}$  to  $RERI_{n-2}$  (points [1] and [2] respectively)

$\sum_{\binom{n}{n-1}} \sum_{\binom{n-1}{n-3}} RR_{(n-3)} \rightarrow (1)_{RR_{(n-3)}}$ , i.e. the part of the summation that  $RR_{(n-3)}$  is calculated from  $RERI_{n-3}$  through the route

$RERI_n \rightarrow RERI_{n-1} \rightarrow RERI_{n-3}$  (we name point [1]),

$\sum_{\binom{n}{n-2}} \sum_{\binom{n-2}{n-3}} RR_{(n-3)} \rightarrow (2)_{RR_{(n-3)}}$ , i.e. the part of the summation that  $RR_{(n-3)}$  is calculated from  $RERI_{n-3}$  through the route

$RERI_n \rightarrow RERI_{n-2} \rightarrow RERI_{n-3}$  (we name point [2]),

$\sum_{\binom{n}{n-3}} RR_{(n-3)} \rightarrow (\emptyset)_{RR_{(n-3)}}$ , i.e. the part of the summation that  $RR_{(n-3)}$  is calculated from  $RERI_{n-3}$  through the direct route

$RERI_n \rightarrow RERI_{n-3}$  (we name no point [ $\emptyset$ ]),

We also name the summation  $\{1\ 2\}_{RR_{(n-3)}}$  as follows

$$\{1\ 2\}_{RR_{(n-3)}} = (1\ 2)_{RR_{(n-3)}} - (1)_{RR_{(n-3)}} - (2)_{RR_{(n-3)}} + (\emptyset)_{RR_{(n-3)}} = \sum_{\binom{n}{n-1}} \sum_{\binom{n-1}{n-2}} \sum_{\binom{n-2}{n-3}} RR_{(n-3)} - \sum_{\binom{n}{n-1}} \sum_{\binom{n-1}{n-3}} RR_{(n-3)} - \sum_{\binom{n}{n-2}} \sum_{\binom{n-2}{n-3}} RR_{(n-3)} + \sum_{\binom{n}{n-3}} RR_{(n-3)}$$

On the same way we have that  $\{1\}_{RR_{(n-2)}} = (1)_{RR_{(n-2)}} - (\emptyset)_{RR_{(n-2)}}$ , because  $\{1\}_{RR_{(n-2)}} = \sum_{\binom{n}{n-1}} \sum_{\binom{n-1}{n-2}} RR_{(n-2)} - \sum_{\binom{n}{n-2}} RR_{(n-2)}$

All routes of  $\{1\}_{RR_{(n-2)}}$  are multiples of  $\binom{n}{n-2}$ , i.e. because of (A.SC.7) we have

$(1)_{RR_{(n-2)}}$  = sum of  $\binom{n}{n-2}$  *different*  $RR_{(n-2)}$ , multiplied by  $b_1$ , where  $b_1 = 2$

$(\emptyset)_{RR_{(n-2)}}$  = sum of  $\binom{n}{n-2}$  *different*  $RR_{(n-2)}$ , multiplied by  $b_2$ , where  $b_2 = 1$

And on the same way, for  $\{1\ 2\}_{RR_{(n-3)}}$ , all routes of  $\{1\ 2\}_{RR_{(n-3)}}$  are multiples of  $\binom{n}{n-3}$

$(1\ 2)_{RR_{(n-3)}}$  = sum of  $\binom{n}{n-3}$  *different*  $RR_{(n-3)}$ , multiplied by  $c_1$ , where  $c_1 = 6$

$(1)_{RR_{(n-3)}}$  = sum of  $\binom{n}{n-3}$  *different*  $RR_{(n-3)}$ , multiplied by  $c_2$ , where  $c_2 = 3$

$(2)_{RR_{(n-3)}} = \text{sum of } \binom{n}{n-3} \text{ different } RR_{(n-3)}, \text{ multiplied by } c_3, \text{ where } c_3 = 3$

$(\emptyset)_{RR_{(n-3)}} = \text{sum of } \binom{n}{n-3} \text{ different } RR_{(n-3)}, \text{ multiplied by } c_4, \text{ where } c_4 = 1$

We further observe that the summation  $\{1 \ 2\}_{RR_{(n-3)}}$  has  $q=2$  points and  $2^q=2^2=4$  routes and are constructed as follows

a) half of the  $\{1 \ 2\}_{RR_{(n-3)}}$  routes ( $=2^{2-1}=2$  routes) have point [2] as last point. This means that

half of the  $\{1 \ 2\}_{RR_{(n-3)}}$  routes ( $=2^{2-1}=2$  routes) are made by the  $\{1\}_{RR_{(n-2)}}$  route after adding point [2] by summing up all  $\sum_{(n-3)}^{(n-2)} RR_{(n-3)}$ , i.e.

$$(1 \ 2)_{RR_{(n-3)}}, \text{ i. e. } RERI_n \rightarrow RERI_{n-1} \rightarrow RERI_{n-2} \rightarrow RERI_{n-3} \rightarrow \sum_{(n-1)}^{(n)} \sum_{(n-2)}^{(n-1)} \sum_{(n-3)}^{(n-2)} RR_{(n-3)} \quad (\text{A.SC.10})$$

and  $(2)_{RR_{(n-3)}} \text{ i. e. } = RERI_n \rightarrow RERI_{n-2} \rightarrow RERI_{n-3} \rightarrow \sum_{(n-2)}^{(n)} \sum_{(n-3)}^{(n-2)} RR_{(n-3)} \quad (\text{A.SC.11})$

We name  $\{1 \ 2\}_{RR_{(n-3);[i]}}$  the routes of  $\{1 \ 2\}_{RR_{(n-3)}}$  having as last point [i], where  $i=0,1$  or  $2$ .

In other words, we name  $\{1 \ 2\}_{RR_{(n-3);[i]}}$  all the routes  $RERI_n \rightarrow \dots \rightarrow RERI_{n-i} \rightarrow RERI_{n-3}$

For  $i=2$  we find that

since  $\{1\}_{RR_{(n-2)}} = \sum_{(n-2)}^{(n)} RR_{(n-2)}$ , and we have that  $\{1 \ 2\}_{RR_{(n-3);[2]}} = \sum_{(n-2)}^{(n)} \sum_{(n-3)}^{(n-2)} RR_{(n-3)} = \binom{3}{1} * \sum_{(n-3)}^{(n)} RR_{(n-3)}$

$$\{1 \ 2\}_{RR_{(n-3);[2]}} = \sum_{\binom{n}{n-1}} \sum_{\binom{n-1}{n-2}} \sum_{\binom{n-2}{n-3}} RR_{(n-3)} - \sum_{\binom{n}{n-2}} \sum_{\binom{n-2}{n-3}} RR_{(n-3)} = \sum_{\binom{n}{n-1}} \sum_{\binom{n-1}{n-2}} \sum_{\binom{n-2}{n-3}} RR_{(n-3)} - \sum_{\binom{n}{n-2}} \sum_{\binom{n-2}{n-3}} RR_{(n-3)} =$$

But due to (A.SC.7), we have that

$$= 2 * \sum_{\binom{n}{n-2}} \sum_{\binom{n-2}{n-3}} RR_{(n-3)} - \sum_{\binom{n}{n-2}} \sum_{\binom{n-2}{n-3}} RR_{(n-3)} = \sum_{\binom{n}{n-2}} \sum_{\binom{n-2}{n-3}} RR_{(n-3)}$$

b)  $2^{2-2}=1$  route of  $\{1 \ 2\}_{RR_{(n-3)}}$  is constructed having as last point [1], i.e.  $\{1 \ 2\}_{RR_{(n-3);[1]}}$

$$\{1 \ 2\}_{RR_{(n-3);[1]}} = (1)_{RR_{(n-3)}}, \text{ i. e. } RERI_n \rightarrow RERI_{n-1} \rightarrow RERI_{n-3} \rightarrow \sum_{\binom{n}{n-1}} \sum_{\binom{n-1}{n-3}} RR_{(n-3)} \quad (\text{A.SC.12})$$

Since  $\{\emptyset\}_{RR_{(n-1)}} = \sum_{\binom{n}{n-1}} RR_{(n-1)}$ , we have that  $\{1 \ 2\}_{RR_{(n-3);[1]}} = \sum_{\binom{n}{n-1}} \sum_{\binom{n-1}{n-3}} RR_{(n-3)} = \binom{3}{1} * \sum_{\binom{n}{n-3}} RR_{(n-3)}$

c) 1 more route of  $\{1 \ 2\}_{RR_{(n-3)}}$  is constructed having as last point [0], i.e.  $\{1 \ 2\}_{RR_{(n-3);[0]}}$

$$\{1 \ 2\}_{RR_{(n-3);[0]}} = (\emptyset)_{RR_{(n-3)}} \text{ i. e. } RERI_n \rightarrow RERI_{n-1} \rightarrow RERI_{n-3} \rightarrow \sum_{\binom{n}{n-3}} RR_{(n-3)}, \quad (\text{A.SC.13})$$

So we have that

$$\{1 \ 2\}_{RR_{(n-3)}} = \sum_{j=1}^3 (-1)^{(j-1)} \sum_{\binom{n}{n-(3-j)}} \sum_{\binom{n-(3-j)}{n-3}} RR_{(n-3)} \quad (\text{A. SC. 14})$$

Now, we are ready to solve (A.SC.3), by applying complete induction to show that the summation of all  $RR_{(n-k)}$ , for all  $k=1,2,\dots,n$  when we replace all  $RER_{(n)}$  up to  $RER_{(n-k)}$  in (A.SC.3) is  $\sum_{\binom{n}{n-k}} RR_{(n-k)}$

In order to prove that, we apply step by step complete induction

1) for  $i=1$ , the summation for  $RR_{(n-1)}$  in (A.SC.3) is (see (A.SC.4))

$$\sum_{\binom{n}{n-1}} RR_{(n-1)}$$

i.e. our hypothesis hold

2) for all  $i=2,3,\dots,k-1$ , the summation for  $RR_{(n-i)}$  in (A.SC.3) is

$$\sum_{\binom{n}{n-i}} RR_{(n-i)}$$

3) for  $i=k$ , we have to show that the summation for  $RR_{(n-k)}$  when we replace all  $RER_{(n)}$  up to  $RER_{(n-k)}$  in (A.SC.3) is

$$\sum_{\binom{n}{n-k}} RR_{(n-k)} \quad (\text{A.SC.15})$$

To prove (A.SC.15), we have to show that

$$\{1 \ 2 \ 3 \ \dots \ (k-2) \ (k-1)\}_{RR_{(n-k);[i]}} = \sum_{\binom{n}{n-i}} \sum_{\binom{n-i}{n-k}} RR_{(n-k)} = \binom{k}{i} * \sum_{\binom{n}{n-k}} RR_{(n-k)} \quad (\text{A. SC. 16})$$

In other words, from (A.SC.16), we have all the different  $RR_{(n-k)}$  appear  $\binom{k}{i}$  times from the routes of

$\{1 \ 2 \ 3 \ \dots \ (k-2) \ (k-1)\}_{RR_{(n-k)}}$  having as last point  $[i]$ , i.e. through all the routes  $RERI_n \rightarrow \dots \rightarrow RERI_{n-i} \rightarrow RERI_{n-k}$

To prove (A.SC.16), we have to show that from the total  $\sum_{\binom{n}{n-i}} RR_{(n-i)}$  of all different  $RR_{(n-i)}$ , we end up to  $\binom{k}{i} * \sum_{\binom{n}{n-k}} RR_{(n-k)}$  different  $RR_{(n-k)}$ .

We have that

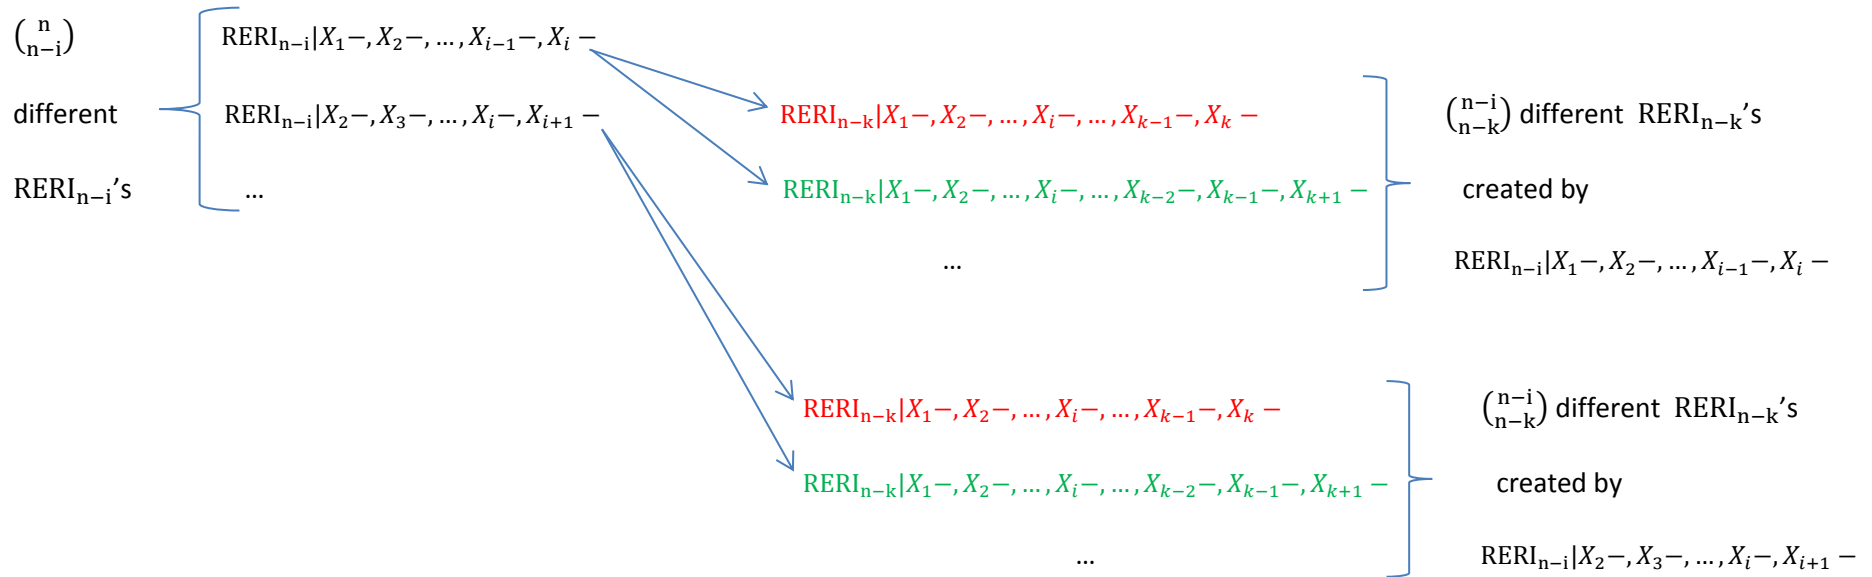

From above, we can observe that all the  $\binom{n}{n-k}$  different  $RR_{n-k}$  are created from all the  $\binom{n}{n-i}$  different  $RR_{n-i}$ 's  $\binom{k}{i}$  times. This is done because, for  $p \in P = \{1, 2, \dots, k\}$ ,  $RR_{n-k} | X_1 -, X_2 -, \dots, X_p -, \dots, X_k -$  is derived by all  $RR_{n-i} | i \text{ of the } X_k = 0$ , with  $i \leq k$ , or in other words,  $i \in I \subset P$ , but from no other  $RR_{n-i} | \text{any } X_q -, \text{ for } q \notin P = \{1, 2, \dots, k\}$ . The number of sets of  $I$ 's, for which  $I \subset P$  is  $\binom{k}{i}$ . So the total  $RR_{(n-k)}$  that will be created through the route  $RR_n \rightarrow \dots \rightarrow RR_{n-i} \rightarrow \dots \rightarrow RR_{n-k}$  is equal to  $\sum_{\binom{n}{n-i}} \sum_{\binom{n-i}{n-k}} RR_{(n-k)} = \binom{k}{i} * \sum_{\binom{n}{n-k}} RR_{(n-k)}$ . So (A.SC.16) holds.

Now, using (A.SC.16), we have that

$\{1 \ 2 \ 3 \ \dots \ (k-2) \ (k-1)\}_{RR_{(n-k)}}$  is constructed by

$$\{1 \ 2 \ 3 \ \dots \ (k-2) \ (k-1)\}_{RR_{(n-k);[k-1]}} = \sum_{\binom{n}{n-(k-1)}} \sum_{\binom{n-(k-1)}{n-k}} RR_{(n-k)} = \sum_{\binom{n}{n-k+1}} \sum_{\binom{n-k+1}{n-k}} RR_{(n-k)} = \binom{k}{k-1} \sum_{\binom{n}{n-k}} RR_{(n-k)}$$

$$\{1 \ 2 \ 3 \ \dots \ (k-2) \ (k-1)\}_{RR_{(n-k);[k-2]}} = \sum_{\binom{n}{n-(k-2)}} \sum_{\binom{n-(k-2)}{n-k}} RR_{(n-k)} = \sum_{\binom{n}{n-k+2}} \sum_{\binom{n-k+2}{n-k}} RR_{(n-k)} = \binom{k}{k-2} \sum_{\binom{n}{n-k}} RR_{(n-k)}$$

...

$$\{1 \ 2 \ 3 \ \dots \ (k-2) \ (k-1)\}_{RR_{(n-k);[1]}} = \sum_{\binom{n}{n-(k-(k-1))}} \sum_{\binom{n-(k-(k-1))}{n-k}} RR_{(n-k)} = \sum_{\binom{n}{n-1}} \sum_{\binom{n-1}{n-k}} RR_{(n-k)} = \binom{k}{1} \sum_{\binom{n}{n-k}} RR_{(n-k)}$$

$$\{1 \ 2 \ 3 \ \dots \ (k-2) \ (k-1)\}_{RR_{(n-k);[\emptyset]}} = \sum_{\binom{n}{n-(k-(k))}} \sum_{\binom{n-(k-(k))}{n-k}} RR_{(n-k)} = \sum_{\binom{n}{n}} \sum_{\binom{n}{n-k}} RR_{(n-k)} = \binom{k}{0} \sum_{\binom{n}{n-k}} RR_{(n-k)}$$

and as we can see from (A.SC.13), in a way that

$$\begin{aligned} \{1 \ 2 \ 3 \ \dots \ (k-2) \ (k-1)\}_{RR_{(n-k)}} &= \{1 \ 2 \ 3 \ \dots \ (k-2) \ (k-1)\}_{RR_{(n-k);[k-1]}} \\ &\quad - \{1 \ 2 \ 3 \ \dots \ (k-2) \ (k-1)\}_{RR_{(n-k);[k-2]}} \\ &\quad + \{1 \ 2 \ 3 \ \dots \ (k-2) \ (k-1)\}_{RR_{(n-k);[k-3]}} \\ &\quad \dots \\ &\quad \pm \{1 \ 2 \ 3 \ \dots \ (k-2) \ (k-1)\}_{RR_{(n-k);[\emptyset]}} \end{aligned} \tag{A.SC.17}$$

So extending (A.SC.14), we have that

$$\{1 \ 2 \ 3 \ \dots \ (k-2) \ (k-1)\}_{RR_{(n-k)}} = \sum_{j=1}^k (-1)^{(j-1)} \sum_{\binom{n}{n-(k-j)}} \sum_{\binom{n-(k-j)}{n-k}} RR_{(n-k)}$$

So, as exactly we worked to prove (A.SC.7), we have that



$$\begin{aligned}
\{1 \ 2 \ 3 \ \dots \ (k-2) \ (k-1)\}_{RR_{(n-k)}} &= \sum_{j=1}^k (-1)^{j-1} \binom{k}{k-(k-j)} \sum_{\binom{n}{n-k}} RR_{(n-k)} = \sum_{\binom{n}{n-k}} RR_{(n-k)} * \sum_{j=1}^k (-1)^{j-1} \binom{k}{j} \\
&= \sum_{\binom{n}{n-k}} RR_{(n-k)} * \left( \binom{k}{0} - \sum_{j=0}^k (-1)^j \binom{k}{j} \right) \\
&= \sum_{\binom{n}{n-k}} RR_{(n-k)} * \left( \binom{k}{0} - \sum_{j=0}^k \binom{k}{j} (1)^{k-j} * (-1)^j \right) \\
&= \sum_{\binom{n}{n-k}} RR_{(n-k)} * (1 - (1-1)^k) = \sum_{\binom{n}{n-k}} RR_{(n-k)}
\end{aligned}$$

The transformation in the last line was applied because

$$\sum_{j=0}^k \binom{k}{j} (x)^{k-j} * (y)^j = (x+y)^k, \text{ for } x=1, y=-1$$

Of note that the same hold for  $k=n-1$  and  $k=n$  for  $RR_{(1)}$ ,  $RR_{(0)}$  respectively i.e. the total summation of  $RR_{(1)}$  and  $RR_{(0)}$  after replacing all  $RERI_{(n)}$  up to  $RERI_{(n-2)}$  from the recurrence relation (A.SC.3) and  $ERR_{(1)} = RR_{(1)} - RR_{(0)}$ ,

$$\sum_{j=1}^{n-1} (-1)^{j-1} \binom{n-1}{n-1-(n-1-j)} \sum_{\binom{n}{n-(n-1)}} RR_{(n-(n-1))} = \sum_{\binom{n}{1}} RR_{(1)}$$

and

$$\sum_{j=1}^n (-1)^{j-1} \binom{n}{n-(n-j)} \sum_{\binom{n}{n-(n)}} RR_{(n-(n))} = RR_{(0)}$$

We also note from the (A.SC.17) that in the final solution, the sign changes from + to - (or vice versa) before each

$$\sum_{\binom{n}{k}} RR_{(k)}$$

So we have that the final solution for the recurrence relationship (A.SC.3) is

$$RERI_n(X_1, X_2, \dots, X_n) = RR_{(n)}$$

$$- \sum_{\binom{n}{n-1}} RR_{(n-1)}$$

$$+ \sum_{\binom{n}{n-2}} RR_{(n-2)}$$

...

$$+(-1)^n * \sum_{\binom{n}{0}} RR_{(0)}$$

or in other words

$$RERI_n(X_1, X_2, \dots, X_n) = \sum_{k=0}^n \sum_{\binom{n}{n-k}} (-1)^k RR_{(n-k)}$$

***QED (see equation 6 in the text)***

Proof of expression (6)

Connection between n-way interaction and (n-1) way interactions

We have to prove expression (7) from the paper, that is

$$RERI_n(X_1, X_2, \dots, X_n) = (RERI_{n-1}(X_1, X_2, \dots, X_n|X_i = 1) * RR_{X_1-X_2-\dots-X_{i+1}-X_i+X_{i+1}-\dots-X_{i+1}-\dots-X_n-}) - RERI_{n-1}(X_1, X_2, \dots, X_n|X_i = 0)$$

From equation 6 in the paper, we have that

$$RERI_n(X_1, X_2, \dots, X_n) = RR_{(n)} - \sum_{\binom{n}{n-1}} RR_{(n-1)} + \sum_{\binom{n}{n-2}} RR_{(n-2)} - \sum_{\binom{n}{n-3}} RR_{(n-3)} + \dots + (-1)^n * \sum_{\binom{n}{0}} RR_{(0)}$$

Using expression (6), we can calculate

$$RERI_{n-1}(X_1, X_2, \dots, X_n|X_i = 1) = \frac{RR_{(n);X_i+} - \sum_{\binom{n-1}{1}} RR_{(n-1);X_i+} + \sum_{\binom{n-1}{2}} RR_{(n-2);X_i+} \dots + (-1)^{n-1} * \sum_{\binom{n-1}{n-1}} RR_{(1);X_i+}}{RR_{X_1-X_2-\dots-X_{i+1}-X_i+X_{i+1}-\dots-X_{i+1}-\dots-X_n}} \quad (A.SC.18)$$

where  $RR_{(k);X_i+}$ ,  $k \leq n$  and  $i \leq n$ , is the relative risk, when k out of n risk factors are present and among them  $X_i$  is present as well.

In (A.SC.18), using the notation  $RR_{(k);X_i+}$ , we denote the RR when k risk factors are present and n-k are absent and  $X_i$  is present

From the above, it is obvious that the term  $RR_{(1);X_i+}$  is equal to  $RR_{(1);X_i+} = RR_{X_1-X_2-\dots-X_{i+1}-X_i+X_{i+1}-\dots-X_{i+1}-\dots-X_n-}$

So, from (A.SC.18), we have that

$$RERI_{n-1}(X_1, X_2, \dots, X_n|X_i = 1) * RR_{X_1-X_2-\dots-X_{i+1}-X_i+X_{i+1}-\dots-X_{i+1}-\dots-X_n-} =$$

$$= RR_{(n);X_i+} - \sum_{\binom{n-1}{1}} RR_{(n-1);X_i+} + \sum_{\binom{n-1}{2}} RR_{(n-2);X_i+} \dots + (-1)^{n-1} * \sum_{\binom{n-1}{n-1}} RR_{(1);X_i+} \quad (\text{A.SC.19})$$

In the same fashion, due to expression 6 we have that

$$RERI_{n-1}(X_1, X_2, \dots, X_n | X_i = 0) = RR_{(n-1);X_i-} - \sum_{\binom{n-1}{n-2}} RR_{(n-2);X_i-} + \sum_{\binom{n-1}{n-3}} RR_{(n-3);X_i-} \dots + (-1)^{n-1} * \sum_{\binom{n-1}{0}} RR_{(0);X_i-} \quad (\text{A.SC.20})$$

where  $RR_{(k);X_i-}$ ,  $k \leq n$  and  $i \leq n$ , is the relative risk, when  $k$  out of  $n$  risk factors are present and risk factor  $X_i$  is absent.

Now, combining (A.SC.19) and (A.SC.20), we have that

$$\begin{aligned} & (RERI_{n-1}(X_1, X_2, \dots, X_n | X_i = 1) * RR_{X_1-X_2-\dots-X_{i+1}-X_i+X_{i+1}-\dots-X_{i+1}-\dots-X_n-}) - RERI_{n-1}(X_1, X_2, \dots, X_n | X_i = 0) = \\ & = RR_{(n);X_i+} - \sum_{\binom{n-1}{1}} RR_{(n-1);X_i+} + \sum_{\binom{n-1}{2}} RR_{(n-2);X_i+} \dots + (-1)^{n-1} * \sum_{\binom{n-1}{n-1}} RR_{(1);X_i+} \\ & - \left( RR_{(n-1);X_i-} - \sum_{\binom{n-1}{n-2}} RR_{(n-2);X_i-} + \sum_{\binom{n-1}{n-3}} RR_{(n-3);X_i-} \dots + (-1)^{n-1} * \sum_{\binom{n-1}{0}} RR_{(0);X_i-} \right) \end{aligned}$$

Now if we try to summarize all  $RR_{(n-j)}$  terms ( $1 \leq j \leq n$ ). We have that

$$\begin{aligned} & (RERI_{n-1}(X_1, X_2, \dots, X_n | X_i = 1) * RR_{X_1-X_2-\dots-X_{i+1}-X_i+X_{i+1}-\dots-X_{i+1}-\dots-X_n-}) - RERI_{n-1}(X_1, X_2, \dots, X_n | X_i = 0) = RR_{(n);X_i+} \\ & - \left( \sum_{\binom{n-1}{n-2}} RR_{(n-1);X_i+} + RR_{(n-1);X_i-} \right) \\ & + \left( \sum_{\binom{n-1}{n-3}} RR_{(n-1);X_i+} + \sum_{\binom{n-1}{n-2}} RR_{(n-1);X_i-} \right) \\ & - \left( \sum_{\binom{n-1}{n-4}} RR_{(n-2);X_i+} + \sum_{\binom{n-1}{n-3}} RR_{(n-2);X_i-} \right) \\ & \dots \end{aligned}$$

$$\begin{aligned}
& +(-1)^j \left( \sum_{\binom{n-1}{n-j}} \text{RR}_{(n-j);X_i+} + \sum_{\binom{n-1}{n-(j-1)}} \text{RR}_{(n-j);X_i-} \right) \\
& \quad \dots \\
& +(-1)^{n-2} \left( \sum_{\binom{n-1}{1}} \text{RR}_{(2);X_i+} + \sum_{\binom{n-1}{2}} \text{RR}_{(2);X_i-} \right) \\
& +(-1)^{n-1} \left( \sum_{\binom{n-1}{0}} \text{RR}_{(1);X_i+} + \sum_{\binom{n-1}{1}} \text{RR}_{(1);X_i-} \right) \\
& +(-1)^n \left( \sum_{\binom{n-1}{0}} \text{RR}_{(0);X_i-} \right) \tag{A.SC.21}
\end{aligned}$$

It is obvious from (A.SC.21), that if we prove for all  $\text{RR}_{(n-j)}$  terms ( $1 \leq j \leq n$ ) that

$$+(-1)^j \left( \sum_{\binom{n-1}{n-j}} \text{RR}_{(n-j);X_i+} + \sum_{\binom{n-1}{n-(j-1)}} \text{RR}_{(n-j);X_i-} \right) = +(-1)^j \left( \sum_{\binom{n}{n-j}} \text{RR}_{(n-j)} \right) \tag{A.SC.22}$$

then we will have also proved equation (7) in the paper.

With a closer look at the first part of (A.SC.22), we have that  $\sum_{\binom{n-1}{n-j}} \text{RR}_{(n-j);X_i+}$  and  $\sum_{\binom{n-1}{n-(j-1)}} \text{RR}_{(n-j);X_i-}$  share no common RRs, given that  $\sum_{\binom{n-1}{n-j}} \text{RR}_{(n-j);X_i+}$  is the summation of all the combinations of different RRs, when  $n-j$  risk factors are present and  $j$  are absent and  $X_i$  is present, while  $\sum_{\binom{n-1}{n-(j-1)}} \text{RR}_{(n-j);X_i-}$  is the summation of all the combinations of different RRs, when  $n-j$  risk factors are present and  $j$  are absent and  $X_i$  is absent, so there is no overlapping of common RRs in that summation. Moreover, it is know from the Pascal rule that

$$\binom{n-1}{n-j} + \binom{n-1}{n-(j-1)} = \binom{n}{n-j}$$

So the summation of  $\sum_{\binom{n-1}{n-j}} RR_{(n-j);X_i+}$  and  $\sum_{\binom{n-1}{n-(j-1)}} RR_{(n-j);X_i-}$  will be equal to  $\sum_{\binom{n}{n-j}} RR_{(n-j)}$ , i.e. the summation of all the combinations of different RRs, when  $n-j$  risk factors are present and  $j$  are absent. ***QED***

So (A.SC.22) is proven, which means that expression (7) in the paper is proven as well.

## **Section D - Clarifications and recommendations for calculating multi-way interactions**

When dealing only with two risk factors, the definition of RERI is pretty straightforward. The only issue that we should take into consideration is that RERI is calculated by risk and not protective factors. So if any of the binary variables  $Z_1$  or  $Z_2$  we use in the analysis is a protective factor, we need to recode them to a risk factor. For example, if  $Z_1$  and  $Z_2$  are both protective factors, we need to create variables  $X_1=1-Z_1$  and  $X_2=1-Z_2$  and calculate  $RERI(X_1, X_2)$ . Nevertheless, when it is of interest the calculation of higher order interactions on the additive scale, we showed that the definitions are getting more complex, so we will try to further elaborate on them.

### **Three-way interactions**

To shed more light in the properties of joint effects of the 3 risk factors of interest, we propose the following steps;

- 1) Conduct the analysis with the exposure of interest  $Z_1, Z_2, Z_3$ , without using any interaction term. We run e.g. Cox regression, and we check if the hazard ratios (HR) are greater than one (i.e. if the exposures are risk factors). If, for example, we have that  $HR(Z_1)>1$ ,  $HR(Z_2)>1$ , but  $HR(Z_3)<1$ , (i.e.  $Z_1, Z_2$  are risk factors, but  $Z_3$  is protective), we have to use the variables  $X_1=Z_1$ ,  $X_2=Z_2$ , and  $X_3=1-Z_3$ . In our illustrative paradigm, we didn't use a variable for the adherence to MD, which is a protective factor for mortality, but for non-adherence to MD instead.



- 2) Perform the analysis with the risk factors of interest  $X_1$ ,  $X_2$ ,  $X_3$ , this time using the interaction terms  $X_1X_2$ ,  $X_1X_3$ ,  $X_2X_3$  and  $X_1X_2X_3$ , as presented in model (A.SB.1) in the Appendix (Section B)
- 3) Compute  $\text{TotRERI}_3(X_1, X_2, X_3)$  (from A.SB.2, Appendix, Section B) and find out whether the effects of  $X_1$ ,  $X_2$ ,  $X_3$  are super-additive ( $\text{TotRERI}_3(X_1, X_2, X_3) > 0$ ), additive ( $\text{TotRERI}_3(X_1, X_2, X_3) = 0$ ) or sub-additive ( $\text{TotRERI}_3(X_1, X_2, X_3) < 0$ ). In our example, we show that the effects of low MD, obesity, and current smoking are super-additive ( $\text{TotRERI}_3(X_1, X_2, X_3) = 1.20 > 0$ ).
- 4) Estimate  $\text{RERI}_3(X_1, X_2, X_3)$  (from A.SB.3, Appendix, Section B) to check whether any deviation from additivity of the three risk factors ( $\text{TotRERI}_3(X_1, X_2, X_3)$ ) is attributed to the 3-way interaction, beyond the two way interactions, given that the 3<sup>rd</sup> risk factor is absent [see equation (3)]. In our example, there was evidence for 3-way additive interaction of the risk factors, beyond their two way interactions.
- 5) Calculate  $\text{RERI}_2(X_1, X_2 | X_3=0)$ ,  $\text{RERI}_2(X_1, X_3 | X_2=0)$  and  $\text{RERI}_2(X_2, X_3 | X_1=0)$  [from (A.SB.4) - (A.SB.6), Appendix, Section B) to test whether any deviation from additivity of the three risk factors (expressed through  $\text{TotRERI}_3(X_1, X_2, X_3)$ ) is attributed to additive interaction of the two risk factors [(see equation (3)], when the third is absent. In our paradigm, all  $\text{RERI}_2$  given the absence of the 3<sup>rd</sup> risk factor were negative, but of small magnitude and not statistically significant.
- 6) Compute  $\text{RERI}_2(X_1, X_2 | X_3=1)$ ,  $\text{RERI}_2(X_1, X_3 | X_2=1)$  and  $\text{RERI}_2(X_2, X_3 | X_1=1)$  (from (A.SB.7) – (A.SB.9) in Appendix, Section B) to check to what extent the interaction due to three risk factors exclusively (i.e  $\text{RERI}_3(X_1, X_2, X_3)$ ) can be interpreted as interaction of the two risk factors, given that the 3<sup>rd</sup> is present. If we combine that information with

the one from step 5, we can additionally check whether  $RERI_2$ 's remain constant across the strata of the 3<sup>rd</sup> risk factor of interest. In our paradigm, we observed that all  $RERI_2$  were positive, given the presence of the 3<sup>rd</sup> risk factor. If we additionally take into consideration  $RERI_2$ 's given the absence of the 3<sup>rd</sup> risk factor (from the previous step), we draw the conclusion that there is difference in how two of these variables interact across the levels of the 3<sup>rd</sup> factor.

7) Check for qualitative interaction, i.e. whether

a) the risk of  $X_1$  is increasing across the strata of  $X_2$  and  $X_3$ , i.e.

$$RR_{X_1+X_2+X_3+} > RR_{X_1-X_2+X_3+} \quad , \quad RR_{X_1+X_2+X_3-} > RR_{X_1-X_2+X_3-} \quad ,$$

$$RR_{X_1+X_2-X_3+} > RR_{X_1-X_2-X_3+} \quad \text{and} \quad RR_{X_1+X_2-X_3-} > RR_{X_1-X_2-X_3-}$$

b) the risk of  $X_2$  is increasing across the strata of  $X_1$  and  $X_3$ , i.e.

$$RR_{X_1+X_2+X_3+} > RR_{X_1+X_2-X_3+} \quad , \quad RR_{X_1+X_2+X_3-} > RR_{X_1+X_2-X_3-} \quad ,$$

$$RR_{X_1-X_2+X_3+} > RR_{X_1-X_2-X_3+} \quad \text{and} \quad RR_{X_1-X_2+X_3-} > RR_{X_1-X_2-X_3-}$$

c) the risk of  $X_3$  is increasing across strata of  $X_1$  and  $X_2$ , i.e.

$$RR_{X_1+X_2+X_3+} > RR_{X_1+X_2+X_3-} \quad , \quad RR_{X_1+X_2-X_3+} > RR_{X_1+X_2-X_3-} \quad ,$$

$$RR_{X_1-X_2+X_3+} > RR_{X_1-X_2+X_3-} \quad \text{and} \quad RR_{X_1-X_2-X_3+} > RR_{X_1-X_2-X_3-}$$

For more details on qualitative interaction, please see Section F

### n-way interactions

The total relative excess risk due to interaction ( $TotRERI_n$ ) is calculated by comparing the joint effect of all n risk factors to the situation when each one acts separately (expression 5).

However,  $TotRERI_n$  is affected by all lower-order interactions of the n risk factors and not

exclusively by the n-way interaction of the risk factors. From equation (A.SC.2), we observe that the sign and magnitude of  $\text{TotRERI}_n$  depends on the sign and magnitude of  $\sum_{\binom{n}{n-1}} \text{RERI}_{n-1}(X_1, X_2, \dots, X_n | 1 \text{ of the } X_i = 0)$ ,  $\sum_{\binom{n}{n-2}} \text{RERI}_{n-2}(X_1, X_2, \dots, X_n | 2 \text{ of the } X_i = 0)$ , ...,  $\sum_{\binom{n}{2}} \text{RERI}_2(X_1, X_2, \dots, X_n | (n-2) \text{ of the } X_i = 0)$ . So,  $\text{RERI}_n(X_1, X_2, \dots, X_n)$  measures the interaction between n risk factors on the additive scale, as this index does not account for all the lower order additive interactions. To shed more light in the properties of joint effects of the n risk factors, we propose the following steps;

- 1) Apply step 1 as in recommendations in the 3-way interactions section, this time for  $Z_1, Z_2, \dots, Z_n$ . From this step, we will end up with the risk factors  $X_1, X_2, \dots, X_n$ .
- 2) Include all possible  $2, 3, \dots, n$  product terms constructed by  $X_1, X_2, \dots, X_n$  in the model, as described in step 2 in recommendations in the 3way interactions section.
- 3) Calculate  $\text{TotRERI}_n(X_1, X_2, \dots, X_n)$  from expression (5).
- 4) Calculate  $\text{RERI}_n(X_1, X_2, \dots, X_n)$  from equation (6)
- 5) Compute all  $\text{RERI}_{n-1}$  given the 1 risk factor is absent ( $\text{RERI}_{n-1}(X_1, X_2, \dots, X_n | 1 \text{ of the } X_i = 0)$ ) from expression (6).
- 6) Estimate all  $\text{RERI}_{n-1}$  given the 1 risk factor is present ( $\text{RERI}_{n-1}(X_1, X_2, \dots, X_n | 1 \text{ of the } X_i = 1)$ ) from equation (A.SC.19)
- 7) We can additionally compute all  $\text{TotRERI}_{n-k}$  and  $\text{RERI}_{n-k}$ ,  $2 \leq k \leq n-2$ , given k risk factors are all absent ( $\text{TotRERI}_{n-k}(X_1, X_2, \dots, X_n | k \text{ of the } X_i = 0)$  and  $\text{RERI}_{n-k}(X_1, X_2, \dots, X_n | k \text{ of the } X_i = 0)$ ) to understand how and under which conditions the n-k risk factors interact for the development of a specific disease. On the same fashion, we can compute all  $\text{TotRERI}_{n-k}(X_1, X_2, \dots, X_n | k \text{ of the } X_i = 1)$  and  $\text{RERI}_{n-k}(X_1, X_2, \dots, X_n | k \text{ of the } X_i = 1)$

8) Check for qualitative interaction, that is

whether the risk of  $X_1$  is increasing across the strata of  $X_2, X_3 \dots X_n$ .

whether the risk of  $X_2$  is increasing across the strata of  $X_1, X_3 \dots X_n$ ,

...

whether the risk of  $X_n$  is increasing across the strata of  $X_1, X_2 \dots X_{n-1}$

## **Section E – Multiplicative interaction and its connection to additive interaction**

### 2-way interactions

The usual practice of the researchers is to refer to statistical interaction when studying interaction between risk factors. Nevertheless, under this concept, interaction is measured on either additive or multiplicative scale, depending on the form of the underlying model used. It is known in the study of the 2-way interactions that then we use Cox or logistic regression, which are inherently multiplicative models, then the beta coefficient of the product term shows whether there is any deviation from the multiplicativity of the effects of two risk factors. More specifically, the effects are super- or sub-multiplicative, if the beta coefficient is greater or lower than zero respectively (or, equivalently, if the odds/hazard ratio is higher or lower than 1). For example, if we run a Cox regression model with exposures  $X_1$  and  $X_2$ , i.e.

$$\lambda(t) = \lambda_0(t) * \exp(b_1X_1 + b_2X_2 + b_3X_1X_2), \quad (\text{A.SE.1})$$

then, we calculate

$$H R(X_1 = 0, X_2 = 0) = RR_{X_1-X_2-} = 1$$

$$H R(X_1 = 1, X_2 = 0) = RR_{X_1+X_2-} = \exp(b_1)$$

$$H R(X_1 = 0, X_2 = 1) = RR_{X_1-X_2+} = \exp(b_2)$$

$$H R(X_1 = 1, X_2 = 1) = RR_{X_1+X_2+} = \exp(b_1 + b_2 + b_3)$$

Then the multiplicative interaction

$$I_2 = \frac{RR_{X_1+X_2+}}{RR_{X_1+X_2-} * RR_{X_1-X_2+}} = \exp(b_3), \quad (\text{A.SE.2})$$

So from (A.SE.2), the effects are super-multiplicative ( $I_2 > 1$ ), if  $b_3 > 0$ ,

the effects are multiplicative ( $I_2=1$ ), if  $b_3=0$  and

the effects are sub-multiplicative ( $I_2<1$ ), if  $b_3<0$ ,

that is, the statistical interaction will show whether there is any deviation from multiplicativity of the effects.

Regarding the connection between multiplicative and additive 2-way interaction, there are 2 inequalities that link the deviation from additivity and from multiplicativity. Both of them hold when there is no qualitative interaction. They also hold if we relax the assumptions of qualitative interaction and we assume only that  $RR_{X_1+X_2-} > RR_{X_1-X_2-} (= 1)$  and

$$RR_{X_1-X_2+} > RR_{X_1-X_2-} (= 1)$$

1) *When the effects of 2 risk factors are either multiplicative or super-multiplicative, then the effects will be super-additive.*

Proof: We have that

$$RERI_2(X_1, X_2) = RR_{X_1+X_2+} - RR_{X_1+X_2-} - RR_{X_1-X_2+} + 1 \quad , \quad (A.SE.3)$$

In the case of multiplicative or super-multiplicative effects of  $X_1$  and  $X_2$ , i.e. when  $I_2 \geq 1$ , from (A.SE.2),  $RR_{X_1+X_2+} \geq RR_{X_1+X_2-} * RR_{X_1-X_2+}$ , so from (A.SE.3) we have

$$\begin{aligned} RERI_2(X_1, X_2) &\geq RR_{X_1+X_2-} * RR_{X_1-X_2+} - RR_{X_1+X_2-} - RR_{X_1-X_2+} + 1 \\ &= RR_{X_1+X_2-} * (RR_{X_1-X_2+} - 1) - (RR_{X_1+X_2-} - 1) \\ &= (RR_{X_1+X_2-} - 1) * (RR_{X_1-X_2+} - 1) > 0 \end{aligned}$$

because  $RR_{X_1+X_2-}$  and  $RR_{X_1-X_2+} > 1$ , as  $X_1$  and  $X_2$  are risk factors. In other words, we proved that when the effects of 2 risk actors are either multiplicative or super-multiplicative, then the effects will be super-additive.

2) When the effects of 2 risk factors are either additive or sub-additive, then the effects will be sub-multiplicative.

Proof: If  $RERI_2(X_1, X_2) \leq 0$ , then  $RR_{X_1+X_2+} \leq RR_{X_1+X_2-} + RR_{X_1-X_2+} - 1$ , so

$$\frac{RR_{X_1+X_2+}}{RR_{X_1+X_2-} + RR_{X_1-X_2+} - 1} \leq 1 \quad (\text{A.SE.4}),$$

so we have to prove that

$$RR_{X_1+X_2-} + RR_{X_1-X_2+} - 1 < RR_{X_1+X_2-} * RR_{X_1-X_2+}, \text{ or equivalently}$$

$$RR_{X_1+X_2-} * RR_{X_1-X_2+} - RR_{X_1+X_2-} - RR_{X_1-X_2+} + 1 > 0 \text{ or equivalently}$$

$$(RR_{X_1+X_2-} - 1) * (RR_{X_1-X_2+} - 1) > 0, \text{ which is true}$$

So from (A.SE.4), we have that

$$I_2 = \frac{RR_{X_1+X_2+}}{RR_{X_1+X_2-} * RR_{X_1-X_2+}} < \frac{RR_{X_1+X_2+}}{RR_{X_1+X_2-} + RR_{X_1-X_2+} - 1} \leq 1$$

So,  $I_2 < 1$ . In other words, we proved that when the effects of 2 risk factors are either additive or sub-additive, then the effects will be sub-multiplicative.

### 3-way interactions

In case of study of 3-way interaction on the multiplicative scale, we should extend the definitions to three risk factors  $X_1$ ,  $X_2$  and  $X_3$ . We will use the worked example from our paper, that is we will use the Cox regression model (A.SB.1).

For the deviation from multiplicativity of the effects of these factors, one should compare

$$RR_{X_1+X_2+X_3+} \quad \text{vs} \quad RR_{X_1+X_2-X_3-} * RR_{X_1-X_2+X_3-} * RR_{X_1-X_2-X_3+}$$

So, we can calculate  $TotI_3(X_1, X_2, X_3)$  to check if there is any deviation from multiplicativity

$$\text{TotI}_3(X_1, X_2, X_3) = \frac{\text{RR}_{X_1+X_2+X_3+}}{\text{RR}_{X_1+X_2-X_3-} * \text{RR}_{X_1-X_2+X_3-} * \text{RR}_{X_1-X_2-X_3+}} \quad (\text{A.SE.5})$$

So we have that

$$\text{TotI}_3(X_1, X_2, X_3) = \frac{\exp(a_1+a_2+a_3+a_4+a_5+a_6+a_7)}{\exp(a_1)*\exp(a_2)*\exp(a_3)} = \exp(a_4 + a_5 + a_6 + a_7) \quad (\text{A.SE.6})$$

On the same fashion, the 2-way multiplicative interaction, given the third factor is absent will be

$$I_2(X_1, X_2 | X_3 = 0) = \frac{\exp(a_1+a_2+a_4)}{\exp(a_1)*\exp(a_2)} = \exp(a_4) \quad (\text{A.SE.7})$$

$$I_2(X_1, X_3 | X_2 = 0) = \frac{\exp(a_1+a_3+a_5)}{\exp(a_1)*\exp(a_3)} = \exp(a_5) \quad (\text{A.SE.8})$$

$$I_2(X_2, X_3 | X_1 = 0) = \frac{\exp(a_2+a_3+a_6)}{\exp(a_1)*\exp(a_2)} = \exp(a_6) \quad (\text{A.SE.9})$$

Moreover, the 2-way multiplicative interaction, given the third factor is present will be

$$I_2(X_1, X_2 | X_3 = 1) = \frac{\exp(a_1+a_2+a_3+a_4+a_5+a_6+a_7)/\exp(a_3)}{\left(\frac{\exp(a_1+a_3+a_5)}{\exp(a_3)}\right) * \left(\frac{\exp(a_2+a_3+a_6)}{\exp(a_3)}\right)} = \exp(a_4 + a_7) \quad (\text{A.SE.10})$$

$$I_2(X_1, X_3 | X_2 = 1) = \frac{\exp(a_1+a_2+a_3+a_4+a_5+a_6+a_7)/\exp(a_2)}{\left(\frac{\exp(a_1+a_2+a_4)}{\exp(a_2)}\right) * \left(\frac{\exp(a_2+a_3+a_6)}{\exp(a_2)}\right)} = \exp(a_5 + a_7) \quad (\text{A.SE.11})$$

$$I_2(X_2, X_3 | X_1 = 1) = \frac{\exp(a_1+a_2+a_3+a_4+a_5+a_6+a_7)/\exp(a_1)}{\left(\frac{\exp(a_1+a_2+a_4)}{\exp(a_1)}\right) * \left(\frac{\exp(a_1+a_3+a_5)}{\exp(a_1)}\right)} = \exp(a_6 + a_7) \quad (\text{A.SE.12})$$

and the 3-way multiplicative interaction, beyond the 2-way interactions will be

$$I_3(X_1, X_2, X_3) = \frac{\text{TotI}_3(X_1, X_2, X_3)}{I_2(X_1, X_2 | X_3 = 0) * I_2(X_1, X_3 | X_2 = 0) * I_2(X_2, X_3 | X_1 = 0)}$$

And if we make the calculations

$$I_3(X_1, X_2, X_3) = \exp(a_7) \quad (\text{A.SE.13})$$



n-way interactions

By extending the definitions of checking for deviation from multiplicativity to the n-way interactions, we have that one should compare

$$RR_{X_1+X_2+\dots+X_n+} \quad \text{vs} \quad RR_{X_1+X_2+\dots+X_n-} * RR_{X_1-X_2+X_3+\dots+X_n-} * \dots * RR_{X_1-X_2+\dots+X_{n-1}-X_n+}$$

We can calculate  $\text{TotI}_n(X_1, X_2, \dots, X_n)$  to check if there is any deviation from multiplicativity

$$\text{TotI}_n(X_1, X_2, \dots, X_n) = \frac{RR_{X_1+X_2+\dots+X_n+}}{RR_{X_1+X_2+\dots+X_n-} * RR_{X_1-X_2+X_3+\dots+X_n-} * \dots * RR_{X_1-X_2+\dots+X_{n-1}-X_n+}} \quad (\text{A.SE.14})$$

To check deviation from additivity, we have from equation (5) that we have to check

$$\begin{aligned} \text{TotRERI}_n(X_1, X_2, \dots, X_n) = & RR_{X_1+X_2+\dots+X_n+} - RR_{X_1+X_2+\dots+X_n-} \\ & - RR_{X_1+X_2+\dots+X_n-} - \dots - RR_{X_1-X_2+\dots+X_{n-1}-X_n+} + (n-1) \end{aligned} \quad (\text{A.SE.15})$$

We will generalize the inequalities we showed for 2-way interactions to the n-way interactions.

Both of them hold when there is no qualitative interaction. They also hold if we relax the assumptions of qualitative interaction and we assume only that

$$RR_{X_1+X_2+\dots+X_n-} > RR_{X_1-X_2+\dots+X_n-} (= 1) \quad \text{and}$$

$$RR_{X_1-X_2+X_3+\dots+X_n-} > RR_{X_1-X_2+\dots+X_n-} (= 1) \quad \text{and}$$

...

$$RR_{X_1-X_2+\dots+X_{n-1}-X_n+} > RR_{X_1-X_2+\dots+X_n-} (= 1)$$

More specifically, we will prove

*1) When the effects of n risk factors are either multiplicative or super-multiplicative, then the effects will be super-additive.*

Proof: If  $\text{TotI}_n(X_1, X_2, \dots, X_n) \geq 1$ , we have that

$$\text{TotRERI}_n(X_1, X_2, \dots, X_n) \geq \text{RR}_{X_1+X_2-\dots-X_n-} * \text{RR}_{X_1-X_2+X_3-\dots-X_n-} * \dots * \text{RR}_{X_1-X_2-\dots-X_{n-1}-X_n+} \\ - \text{RR}_{X_1+X_2-\dots-X_n-} - \text{RR}_{X_1-X_2+X_3-\dots-X_n-} - \dots - \text{RR}_{X_1-X_2-\dots-X_{n-1}-X_n+} + (n-1)$$

Now we have to prove that

$$\text{RR}_{X_1+X_2-\dots-X_n-} * \text{RR}_{X_1-X_2+X_3-\dots-X_n-} * \dots * \text{RR}_{X_1-X_2-\dots-X_{n-1}-X_n+} \\ - \text{RR}_{X_1+X_2-\dots-X_n-} - \text{RR}_{X_1-X_2+X_3-\dots-X_n-} - \dots - \text{RR}_{X_1-X_2-\dots-X_{n-1}-X_n+} + (n-1) > 0 \quad (\text{A.SE.16})$$

We have that

$$\text{RR}_{X_1+X_2-\dots-X_n-} * \text{RR}_{X_1-X_2+X_3-\dots-X_n-} * \dots * \text{RR}_{X_1-X_2-\dots-X_{n-1}-X_n+} \\ - \text{RR}_{X_1+X_2-\dots-X_n-} - \text{RR}_{X_1-X_2+X_3-\dots-X_n-} - \dots - \text{RR}_{X_1-X_2-\dots-X_{n-1}-X_n+} + (n-1) =$$

1<sup>st</sup> step  $\rightarrow$  remove  $\text{RR}_{X_1+X_2-\dots-X_n-}$  from the equation

$$= \text{RR}_{X_1+X_2-\dots-X_n-} * (\text{RR}_{X_1-X_2+X_3-\dots-X_n-} * \dots * \text{RR}_{X_1-X_2-\dots-X_{n-1}-X_n+} - 1) \\ - \text{RR}_{X_1-X_2+\dots-X_n-} - \dots - \text{RR}_{X_1-X_2-\dots-X_{n-1}-X_n+} + (n-1) > \quad (\text{because } \text{RR}_{X_1+X_2-\dots-X_n-} > 1) \\ (\text{RR}_{X_1-X_2+X_3-\dots-X_n-} * \dots * \text{RR}_{X_1-X_2-\dots-X_{n-1}-X_n+} - 1) \\ - \text{RR}_{X_1-X_2+\dots-X_n-} - \dots - \text{RR}_{X_1-X_2-\dots-X_{n-1}-X_n+} + (n-1) = \\ (\text{RR}_{X_1-X_2+X_3-\dots-X_n-} * \dots * \text{RR}_{X_1-X_2-\dots-X_{n-1}-X_n+}) \\ - \text{RR}_{X_1-X_2+\dots-X_n-} - \dots - \text{RR}_{X_1-X_2-\dots-X_{n-1}-X_n+} + (n-2) =$$

2<sup>nd</sup> step  $\rightarrow$  remove  $\text{RR}_{X_1-X_2+X_3-\dots-X_n-}$  from the equation

$$= \text{RR}_{X_1-X_2+X_3-\dots-X_n-} * (\text{RR}_{X_1-X_2-X_3+X_4-\dots-X_n-} * \dots * \text{RR}_{X_1-X_2-\dots-X_{n-1}-X_n+} - 1) \\ - \text{RR}_{X_1-X_2-X_3+X_4-\dots-X_n-} - \dots - \text{RR}_{X_1-X_2-\dots-X_{n-1}-X_n+} + (n-2) > \quad (\text{because } \text{RR}_{X_1-X_2+X_3-\dots-X_n-} > 1) \\ (\text{RR}_{X_1-X_2-X_3+X_4-\dots-X_n-} * \dots * \text{RR}_{X_1-X_2-\dots-X_{n-1}-X_n+} - 1) \\ - \text{RR}_{X_1-X_2+\dots-X_n-} - \dots - \text{RR}_{X_1-X_2-\dots-X_{n-1}-X_n+} + (n-2) =$$

$$\begin{aligned}
& (RR_{X_1-X_2-X_3+X_4-\dots-X_n-} * \dots * RR_{X_1-X_2-\dots-X_{n-1}-X_n+}) \\
& -RR_{X_1-X_2+\dots-X_n-} - \dots - RR_{X_1-X_2-\dots-X_{n-1}-X_n+} + (n-3) > \\
& \dots
\end{aligned}$$

(n-2)<sup>th</sup> step  $\rightarrow$  remove  $RR_{X_1-X_2-\dots-X_{n-3}-X_{n-2}+X_{n-1}-X_n-}$  from the equation)

$$\begin{aligned}
& RR_{X_1-X_2-\dots-X_{n-3}-X_{n-2}+X_{n-1}-X_n-} * (RR_{X_1-X_2-\dots-X_{n-2}-X_{n-1}+X_n-} * RR_{X_1-X_2-\dots-X_{n-1}-X_n+} - 1) \\
& -RR_{X_1-X_2-\dots-X_{n-2}-X_{n-1}+X_n-} - RR_{X_1-X_2-\dots-X_{n-1}-X_n+} + (n - (n-2)) > \\
& (\text{because } RR_{X_1-X_2-\dots-X_{n-3}-X_{n-2}+X_{n-1}-X_n-} > 1) \\
& (RR_{X_1-X_2-\dots-X_{n-2}-X_{n-1}+X_n-} * RR_{X_1-X_2-\dots-X_{n-1}-X_n+} - 1) \\
& -RR_{X_1-X_2-\dots-X_{n-2}-X_{n-1}+X_n-} - RR_{X_1-X_2-\dots-X_{n-1}-X_n+} + (n - (n-2)) = \\
& (RR_{X_1-X_2-\dots-X_{n-2}-X_{n-1}+X_n-} * RR_{X_1-X_2-\dots-X_{n-1}-X_n+}) \\
& -RR_{X_1-X_2-\dots-X_{n-2}-X_{n-1}+X_n-} - RR_{X_1-X_2-\dots-X_{n-1}-X_n+} + 2 - 1 = \\
& (RR_{X_1-X_2-\dots-X_{n-2}-X_{n-1}+X_n-} * RR_{X_1-X_2-\dots-X_{n-1}-X_n+}) \\
& -RR_{X_1-X_2-\dots-X_{n-2}-X_{n-1}+X_n-} - RR_{X_1-X_2-\dots-X_{n-1}-X_n+} + 1 = \\
& (RR_{X_1-X_2-\dots-X_{n-2}-X_{n-1}+X_n-}) * (RR_{X_1-X_2-\dots-X_{n-1}-X_n+} - 1) - (RR_{X_1-X_2-\dots-X_{n-1}-X_n+} - 1) = \\
& (RR_{X_1-X_2-\dots-X_{n-2}-X_{n-1}+X_n-} - 1) * (RR_{X_1-X_2-\dots-X_{n-1}-X_n+} - 1) > 0
\end{aligned}$$

because  $RR_{X_1-X_2-\dots-X_{n-2}-X_{n-1}+X_n-}$  and  $RR_{X_1-X_2-\dots-X_{n-1}-X_n+} > 1$

So, we proved that when the effects of n risk factors are either multiplicative of super-multiplicative, then the effects will be super-additive.

2) When the effects of n risk factors are either additive or sub-additive, then the effects will be sub-multiplicative.

Proof: If  $\text{TotRERI}_n(X_1, X_2, \dots, X_n) \leq 0$ , then

$$\begin{aligned} & RR_{X_1+X_2-\dots-X_n-} * RR_{X_1-X_2+X_3-\dots-X_n-} * \dots * RR_{X_1-X_2-\dots-X_{n-1}-X_n+} \\ & - RR_{X_1+X_2-\dots-X_n-} - RR_{X_1-X_2+X_3-\dots-X_n-} - \dots - RR_{X_1-X_2-\dots-X_{n-1}-X_n+} + (n-1) \leq 0 \end{aligned}$$

or equivalently

$$\frac{RR_{X_1+X_2-\dots-X_n-} * RR_{X_1-X_2+X_3-\dots-X_n-} * \dots * RR_{X_1-X_2-\dots-X_{n-1}-X_n+}}{RR_{X_1+X_2-\dots-X_n-} + RR_{X_1-X_2+X_3-\dots-X_n-} + \dots + RR_{X_1-X_2-\dots-X_{n-1}-X_n+} - (n-1)} \leq 1 \quad (\text{A.SE.17})$$

From (A.SE.14), we have that

$$\text{TotI}_n(X_1, X_2, \dots, X_n) = \frac{RR_{X_1+X_2+\dots-X_n+}}{RR_{X_1+X_2-\dots-X_n-} * RR_{X_1-X_2+X_3-\dots-X_n-} * \dots * RR_{X_1-X_2-\dots-X_{n-1}-X_n+}} <$$

(because of (A.SE.16))

$$\frac{RR_{X_1+X_2-\dots-X_n-} * RR_{X_1-X_2+X_3-\dots-X_n-} * \dots * RR_{X_1-X_2-\dots-X_{n-1}-X_n+}}{RR_{X_1+X_2-\dots-X_n-} + RR_{X_1-X_2+X_3-\dots-X_n-} + \dots + RR_{X_1-X_2-\dots-X_{n-1}-X_n+} - (n-1)} \leq 1 \quad \text{because of (A.SE.17)}$$

So we proved that when  $\text{TotRERI}_n(X_1, X_2, \dots, X_n) \leq 0$ , then  $\text{TotI}_n(X_1, X_2, \dots, X_n) < 1$ . In other words, we showed that when the effects of n risk factors are either additive or sub-additive, then the effects will be sub-multiplicative.

### Connection between deviation from additivity and multiplicativity from the worked example

We can calculate  $\text{TotI}_3=1.20>1$  from (A.SE.6), so the effects of low MD, obesity and smoking status on mortality are super-multiplicative (even not statistically significant), meaning that we also expect that these effects would also be super-additive (from the 1st inequality). This is true, because  $\text{TotRERI}_3=1.20>0$ , in other words, there is an excess 120% risk due to the joint presence of all risk factors, compared to the situation that each of them would act separately

The 3-way interaction of these factors beyond the 2-way interactions was positive both under the additive and under the multiplicative scale ( $RERI_3=1.98$  and  $I_3=2.51$ ), however there is not a direct link between these two indices. The only conclusion that we can infer from equations (A.SB3) and (A.SE13) is that the greater the value of  $I_3$  is, the greater the value of  $RERI_3$  will be as well (the opposite is not always true), without any guarantee that  $RERI_3$  will be positive, depending on a specific value for  $I_3$ .

Moreover, all the  $RERI_2$  given the absence of the 3<sup>rd</sup> risk factor are negative, indicating that the corresponding all the effects between 2 risk factors, when the 3<sup>rd</sup> is absent, will be sub-multiplicative (from the 2<sup>nd</sup> inequality). More specifically, we had that

$$I_2(\text{low MD, high BMI / never or former smokers})=0.77<1$$

$$I_2(\text{low MD, current smokers / low BMI})= 0.79<1$$

$$I_2(\text{high BMI, current smokers / high MD})= 0.79<1$$

Regarding the 2-way interactions, when the 3<sup>rd</sup> factor was present, when we calculate that all the  $I_2$ 's, we find that the effects of every 2 risk factors, when the 3<sup>rd</sup> is present, were super-multiplicative;

$$I_2(\text{low MD, high BMI / current smokers})=1.98>1$$

$$I_2(\text{low MD, current smokers / high BMI})= 1.99>1$$

$$I_2(\text{high BMI, current smokers / low MD})= 1.92>1$$

indicating that the corresponding effects will be super-additive, that's why all  $RERI_2$ 's were positive.

In this example, we found that the interpretation doesn't change, if we convert to deviation from multiplicativity as reference. However, this is not always true. We showed above that

$$1) \text{ If } TotI_3 \geq 1 \rightarrow TotRERI_3 > 0 \text{ and}$$

$$2) \text{ If } TotRERI_3 \leq 0 \rightarrow TotI_3 < 1$$

The opposite in these relationships does not always hold. In other words, it is possible to observe super-additive effects, which can be sub-multiplicative ( $\text{TotRERI}_3 > 0$  &  $\text{TotI}_3 < 1$ )

We also mentioned that the greater the value of  $I_3$  is, the greater the value of  $\text{RERI}_3$  will be.

Nevertheless, there is no specific interval lower limit for  $\text{RERI}_3$  for different values of  $I_3$ .

## **Section F – Qualitative interaction**

We refer to the term qualitative (or cross-over) interaction when the exposure of interest is a risk factor for a specific outcome for one subgroup, but a protective factor for another subgroup. For example, a specific medication might be beneficial in younger people, but not in the elderly.

Qualitative interaction is very crucial for decision making for public health purposes, because, in such instances, we should not treat all the subgroups, but only those people for which the medication is beneficial.

To check for qualitative interaction in case of 2 risk factors  $X_1$  and  $X_2$ , we should check

1) Whether the risk of  $X_1$  is increasing across the strata of  $X_2$ , i.e.

$$RR_{X_1+X_2+} > RR_{X_1-X_2+} \quad \text{and} \quad RR_{X_1+X_2-} > RR_{X_1-X_2-}$$

and

2) Whether the risk of  $X_2$  is increasing across the strata of  $X_1$ , i.e.

$$RR_{X_1+X_2+} > RR_{X_1+X_2-} \quad \text{and} \quad RR_{X_1-X_2+} > RR_{X_1-X_2-}$$

To apply the same in case of 3 risk factors  $X_1$ ,  $X_2$  and  $X_3$ , we should check

1) whether the risk of  $X_1$  is increasing across the strata of  $X_2$  and  $X_3$ , i.e.

$$RR_{X_1+X_2+X_3+} > RR_{X_1-X_2+X_3+} \quad , \quad RR_{X_1+X_2+X_3-} > RR_{X_1-X_2+X_3-} \quad , \quad RR_{X_1+X_2-X_3+} > RR_{X_1-X_2-X_3+}$$

$$\text{and } RR_{X_1+X_2-X_3-} > RR_{X_1-X_2-X_3-}$$

2) whether the risk of  $X_2$  is increasing across the strata of  $X_1$  and  $X_3$ , i.e.

$$RR_{X_1+X_2+X_3+} > RR_{X_1+X_2-X_3+} \quad , \quad RR_{X_1+X_2+X_3-} > RR_{X_1+X_2-X_3-} \quad , \quad RR_{X_1-X_2+X_3+} > RR_{X_1-X_2-X_3+}$$

$$\text{and } RR_{X_1-X_2+X_3-} > RR_{X_1-X_2-X_3-}$$

3) whether the risk of  $X_3$  is increasing across strata of  $X_1$  and  $X_2$ , i.e.

$$RR_{X_1+X_2+X_3+} > RR_{X_1+X_2+X_3-} \quad , \quad RR_{X_1+X_2-X_3+} > RR_{X_1+X_2-X_3-} \quad , \quad RR_{X_1-X_2+X_3+} > RR_{X_1-X_2+X_3-}$$

and  $RR_{X_1-X_2-X_3+} > RR_{X_1-X_2-X_3-}$

The same procedure should be followed for multi-way interactions, i.e. to check

1) whether the risk of  $X_1$  is increasing across the strata of  $X_2, X_3 \dots X_n$ .

2) whether the risk of  $X_2$  is increasing across the strata of  $X_1, X_3 \dots X_n$ ,

...

n) whether the risk of  $X_n$  is increasing across the strata of  $X_1, X_2 \dots X_{n-1}$

In Section C of the Appendix, we show how these calculations can be applied in Stata, in case of 3 risk factors,  $X_1, X_2$  and  $X_3$ .

Qualitative interaction occurs very rarely in the study of the joint effects of 2 risk factors, that's why it is not mentioned in the literature frequently. It is very likely to happen rarely in the case of 3 risk factors as well, but it is more possible to occur when studying more >3 risk factors (the more we increase the factors of interest, the more likely to observe qualitative interactions)

So, when conducting a multi-way interaction analysis, we should additionally test whether the risk of a risk factor, is increasing across the different subgroups of interest of the population.

In other words, a researcher should assess the results from the interaction analysis (TotRERI and RERIs), as we did in the main body of the manuscript, and additionally test whether there is qualitative interaction. In the case that qualitative interaction exists, then one should comment on the corresponding consequences (e.g. that a specific medication is protective for CVD in one



subgroup of the study while it is not in another), apart from the discussion of the results of interaction analysis (RERIs and TotRERIs).

**Section G: Estimation of additive interactions between 3 risk factors from contingency tables**

In this section, we present the calculation of interactions between 3 risk factors on the additive scale from contingency tables.

In the hypothetical example below, we present the risk  $p$  of the outcome D, in all potential combinations of presence or absence of the binary exposures  $X_1$ ,  $X_2$  and  $X_3$

*Table S1: Risk of outcome D by cross-classified exposure status, defined by presence/absence of the exposures  $X_1$ ,  $X_2$  and  $X_3$*

| <b><math>X_3=0</math></b> |                            |                            | <b><math>X_3=1</math></b> |                            |                            |
|---------------------------|----------------------------|----------------------------|---------------------------|----------------------------|----------------------------|
|                           | <b><math>X_1=0</math></b>  | <b><math>X_1=1</math></b>  |                           | <b><math>X_1=0</math></b>  | <b><math>X_1=1</math></b>  |
| <b><math>X_2=0</math></b> | $p_{X_1-X_2-X_3-} = 0.01$  | $p_{X_1+X_2-X_3-} = 0.012$ | <b><math>X_2=0</math></b> | $p_{X_1-X_2-X_3+} = 0.012$ | $p_{X_1+X_2-X_3+} = 0.014$ |
| <b><math>X_2=1</math></b> | $p_{X_1-X_2+X_3-} = 0.015$ | $p_{X_1+X_2+X_3-} = 0.019$ | <b><math>X_2=1</math></b> | $p_{X_1-X_2+X_3+} = 0.018$ | $p_{X_1+X_2+X_3+} = 0.028$ |

From the table S1, we can directly calculate the risk ratios (RR) of developing the outcome D, when the corresponding risk factor are present or absent. Specifically,

$$RR_{X_1-X_2-X_3-} = \frac{p_{X_1-X_2-X_3-}}{p_{X_1-X_2-X_3-}} = 1 \text{ (reference category)}$$

$$RR_{X_1+X_2-X_3-} = \frac{p_{X_1+X_2-X_3-}}{p_{X_1-X_2-X_3-}} = 1.2$$

$$RR_{X_1-X_2+X_3-} = \frac{p_{X_1-X_2+X_3-}}{p_{X_1-X_2-X_3-}} = 1.5$$

$$RR_{X_1-X_2-X_3+} = \frac{p_{X_1-X_2-X_3+}}{p_{X_1-X_2-X_3-}} = 1.2$$

$$RR_{X_1+X_2+X_3-} = \frac{p_{X_1+X_2+X_3-}}{p_{X_1-X_2-X_3-}} = 1.9$$

$$RR_{X_1+X_2-X_3+} = \frac{p_{X_1+X_2-X_3+}}{p_{X_1-X_2-X_3-}} = 1.4$$

$$RR_{X_1-X_2+X_3+} = \frac{p_{X_1-X_2+X_3+}}{p_{X_1-X_2-X_3-}} = 1.8$$

$$RR_{X_1+X_2+X_3+} = \frac{p_{X_1+X_2+X_3+}}{p_{X_1-X_2-X_3-}} = 2.8$$

So, then it is straightforward to estimate all the potential 2-way and 3 way interactions, i.e.

$$RERI_2(X_1, X_2 | X_3 = 0) = (RR_{X_1+X_2+X_3-} - RR_{X_1-X_2-X_3-}) - (RR_{X_1+X_2-X_3-} - RR_{X_1-X_2-X_3-}) - (RR_{X_1-X_2+X_3-} - RR_{X_1-X_2-X_3-}) = 0.2$$

$$RERI_2(X_1, X_3 | X_2 = 0) = (RR_{X_1+X_2-X_3+} - RR_{X_1-X_2-X_3-}) - (RR_{X_1+X_2-X_3-} - RR_{X_1-X_2-X_3-}) - (RR_{X_1-X_2-X_3+} - RR_{X_1-X_2-X_3-}) = 0.1$$

$$RERI_2(X_2, X_3 | X_1 = 0) = (RR_{X_1-X_2+X_3+} - RR_{X_1-X_2-X_3-}) - (RR_{X_1-X_2+X_3-} - RR_{X_1-X_2-X_3-}) - (RR_{X_1-X_2-X_3+} - RR_{X_1-X_2-X_3-}) = 0$$

$$RERI_2(X_1, X_2 | X_3 = 1) = \frac{(RR_{X_1+X_2+X_3+} - RR_{X_1+X_2-X_3+} - RR_{X_1-X_2+X_3+} + RR_{X_1-X_2-X_3+})}{RR_{X_1-X_2-X_3+}} = 0.67$$

$$RERI_2(X_1, X_3 | X_2 = 1) = \frac{(RR_{X_1+X_2+X_3+} - RR_{X_1+X_2+X_3-} - RR_{X_1-X_2+X_3+} + RR_{X_1-X_2+X_3-})}{RR_{X_1-X_2+X_3-}} = 0.58$$

$$RERI_2(X_2, X_3 | X_1 = 1) = \frac{(RR_{X_1+X_2+X_3+} - RR_{X_1+X_2+X_3-} - RR_{X_1+X_2-X_3+} + RR_{X_1+X_2-X_3-})}{RR_{X_1+X_2-X_3-}} = 0.4$$

$$RERI_3(X_1, X_2, X_3) = RR_{X_1+X_2+X_3+} - RR_{X_1+X_2+X_3-} - RR_{X_1+X_2-X_3+} - RR_{X_1-X_2+X_3+} + RR_{X_1+X_2-X_3-} + RR_{X_1-X_2+X_3-} + RR_{X_1-X_2-X_3+} - 1 = 0.6$$

$$TotRERI_3(X_1, X_2, X_3) = RR_{X_1+X_2+X_3+} - RR_{X_1+X_2-X_3-} - RR_{X_1-X_2+X_3-} - RR_{X_1-X_2-X_3+} + 2 = 0.9$$

## **Section H: Simulation study**

We conducted a small simulation study to demonstrate the accuracy of the proposed measures for additive interaction. The data generating mechanism and the values chosen for the simulations were informed by our motivating example. More specifically, we simulate event times (deaths) according to a Weibull model ( $\lambda=0.066$ ,  $\gamma=2$ ). As in the Greek-EPIC study, mortality rate in the simulated scenarios is around 8% and mean survival  $\sim 10$  years. Given that the focus of the paper is on multi-way interactions, the simulation study focused on two main scenarios where:

We simulated the same log-hazard ratios with the Greek-EPIC study (i.e. beta coefficients from table 2, upper panel) in 2 different scenarios

Scenario 1:  $X_1, X_2, X_3$  are simulated independently

Scenario 2:  $X_1, X_2, X_3$  are correlated

The correlation parameters between  $X_1, X_2$  and  $X_3$  in scenario 2 were informed by our motivating example, i.e.  $corr(X_1, X_2) = 0.027$ ,  $corr(X_2, X_3) = -0.152$ ,  $corr(X_1, X_3) = -0.008$

The simulations are presented in github ([https://github.com/mkatsoulis82/Multi-way\\_interaction/blob/master/simulations.do](https://github.com/mkatsoulis82/Multi-way_interaction/blob/master/simulations.do))

The simulations assessed bias and confidence interval (CI) coverage across the different measures of additive interaction, including  $TotRERI_3(X_1, X_2, X_3)$ ,  $RERI_3(X_1, X_2, X_3)$ ,  $RERI_2(X_1, X_2|X_3 = 0)$ ,  $RERI_2(X_1, X_3|X_2 = 0)$ ,  $RERI_2(X_2, X_3|X_1 = 0)$ ,  $RERI_2(X_1, X_2|X_3 = 1)$ ,  $RERI_2(X_1, X_3|X_2 = 1)$ , and  $RERI_2(X_2, X_3|X_1 = 1)$ . These parameters were estimated by applying a Cox regression model to 1000 simulated datasets. The simulation results show negligible biases and CI coverage close to nominal levels (95%) across all the measures of additive interaction.

Table S2 – Parameter estimates, bias, percentage bias and confidence interval coverage for a scenario where the covariates  $X_1, X_2, X_3$  are independent.

| <b>Measures of additive interaction</b> | <b>True value (<math>\theta</math>)</b> | <b>Estimate (<math>E(\hat{\theta})</math>)</b> | <b>Bias [<math>E(\hat{\theta}) - \theta</math>]</b> | <b>Bias (%)</b> | <b>CI coverage*</b> |
|-----------------------------------------|-----------------------------------------|------------------------------------------------|-----------------------------------------------------|-----------------|---------------------|
| $TotRERI_3(X_1, X_2, X_3)$              | 1.179                                   | 1.189                                          | 0.010                                               | 0.9%            | 0.944               |
| $RERI_3(X_1, X_2, X_3)$                 | 1.970                                   | 2.005                                          | 0.036                                               | 1.8%            | 0.957               |
| $RERI_2(X_1, X_2 X_3 = 0)$              | -0.307                                  | -0.315                                         | -0.008                                              | 2.5%            | 0.958               |
| $RERI_2(X_1, X_3 X_2 = 0)$              | -0.224                                  | -0.233                                         | -0.009                                              | 4.0%            | 0.943               |
| $RERI_2(X_2, X_3 X_1 = 0)$              | -0.259                                  | -0.268                                         | -0.009                                              | 3.4%            | 0.957               |
| $RERI_2(X_1, X_2 X_3 = 1)$              | 1.103                                   | 1.119                                          | 0.016                                               | 1.5%            | 0.944               |
| $RERI_2(X_1, X_3 X_2 = 1)$              | 1.306                                   | 1.323                                          | 0.016                                               | 1.3%            | 0.950               |
| $RERI_2(X_2, X_3 X_1 = 1)$              | 1.193                                   | 1.210                                          | 0.016                                               | 1.3%            | 0.953               |

\*Confidence interval coverage nominal level is 0.95.

Table S3 – Parameter estimates, bias, percentage bias and confidence interval coverage for a scenario where the covariates  $X_1, X_2, X_3$  are correlated†

| Measures of additive interaction | True value ( $\theta$ ) | Estimate ( $E(\hat{\theta})$ ) | Bias [ $E(\hat{\theta}) - \theta$ ] | Bias (%) | CI coverage* |
|----------------------------------|-------------------------|--------------------------------|-------------------------------------|----------|--------------|
| $TotRERI_3(X_1, X_2, X_3)$       | 1.179                   | 1.203                          | 0.025                               | 2.1%     | 0.941        |
| $RERI_3(X_1, X_2, X_3)$          | 1.970                   | 2.007                          | 0.037                               | 1.9%     | 0.946        |
| $RERI_2(X_1, X_2   X_3 = 0)$     | -0.307                  | -0.313                         | -0.005                              | 1.7%     | 0.957        |
| $RERI_2(X_1, X_3   X_2 = 0)$     | -0.224                  | -0.231                         | -0.007                              | 3.1%     | 0.951        |
| $RERI_2(X_2, X_3   X_1 = 0)$     | -0.259                  | -0.260                         | -0.0004                             | 0.2%     | 0.963        |
| $RERI_2(X_1, X_2   X_3 = 1)$     | 1.103                   | 1.125                          | 0.022                               | 2%       | 0.949        |
| $RERI_2(X_1, X_3   X_2 = 1)$     | 1.306                   | 1.327                          | 0.021                               | 1.6%     | 0.937        |
| $RERI_2(X_2, X_3   X_1 = 1)$     | 1.193                   | 1.127                          | 0.024                               | 2%       | 0.944        |

† $corr(X_1, X_2) = 0.027, corr(X_2, X_3) = -0.152, corr(X_1, X_3) = -0.008,$

\*Confidence interval coverage nominal level is 0.95.
